# Supplementary material for: A model for interpreting the deformation mechanism of reservoir landslides in theThree Gorges Reservoir area, China
Source: Copernicus journal article supplement (doi:10.5194/nhess-2019-432), 2020-03-18
Supplement: Supplementary file [file nhess-2019-432-AC2-supplement.pdf]

**Reply to Reviewer 2's comments on "A model for interpreting the deformation mechanism of reservoir landslides in the Three Gorges Reservoir area, China" (nhess-2019-432)**

Dear Editor and Reviewer,

Thank you for editor's efforts on dealing our manuscript and reviewer's very kind comment on your manuscript. We have studied reviewer's comments carefully and made corrections as suggested. The revised portions are marked in RED in new manuscript (MS).

Below we list every comment received (in *italics*), followed by our response in regular font.

**General comment**

1. *The subject manuscript, "A model for interpreting the deformation mechanism of reservoir landslides in the Three Gorges Reservoir area, China" is an important case study of a large, deep landslide that has been affected by reservoir impoundment and fluctuations. The manuscript is logically organized, well written and presents a long record of data relating landslide movement, reservoir levels, and precipitation.*

**Response:** Thanks for reviewer's kind comments.

**Specific comments:**

1. *My primary criticism of the paper is that the authors seem to be unaware of previous studies that have presented similar, closely related models to that presented in sections 2.2 and 2.3. Although most previous work cited in the following lines does not specifically address reservoir effects on landslides, the relationships between landslide geometry, deformation, dynamics, and stability identified in previous studies is relevant to the case presented in the subject manuscript. The model has concepts in common with the wedge method for analyzing landslides consisting of an active driving wedge and resisting block (Terzaghi & Peck, 1967; Sultan and Seed, 1967). Hutchinson (1984) presented an "influence-line" approach for assessing effectiveness of cuts and fills in stabilizing slopes, which is also similar to the models in sections 2.2 and 2.3. Iverson (1986) described relationships between stress distribution and landslide geometry. Baum and Fleming (1991) described the relationship between displacement patterns and the results of stability analysis, and derived expressions for the boundary between driving and resisting elements of landslides.*

*Interestingly, they concluded that the boundary is near the thickest part of the landslide, consistent with the findings of this manuscript. Drawing on insights gained from these earlier studies, McKean and Roering (2004), Guerriero et al. (2014), Prokesova et al. (2014), and Handwerger et al. (2015) as well as others, have further explored the influence of slip-surface and landslide geometry on slide deformation, force distribution and landslide dynamics.*

*In addition to strengthening the background section/literature review to show the relationship of the authors' model to previous work.*

**References cited:**

- ✓ *Baum, R.L., Fleming, R.W., 1991. Use of longitudinal strain in identifying driving and resisting elements of landslides. Geol. Soc. Am. Bull. 103, 1121–1132.*
- ✓ *Guerriero, L., Coe, J.A., Revellino, P., Grelle, G., Pinto, F., and Guadagno, F.M., 2014, Influence of slip-surface geometry on earth-flow deformation, Montaguto earth flow, southern Italy: Geomorphology, v. 219, p. 285-305. <http://dx.doi.org/10.1016/j.geomorph.2014.04.039>*
- ✓ *Handwerger, A.L., Roering, J., Schmidt, D.A., and Rempel, A.W., 2015, Kinematics of earthflows in the Northern California Coast Ranges using satellite interferometry: Geomorphology v. 246, p.321–333.*
- ✓ *Hutchinson, J.N., 1984, An influence line approach to the stabilization of slopes by cuts and fills: Canadian Geotechnical Journal, v. 21, p. 363-370.*
- ✓ *Iverson, R.M., 1986. Unsteady, nonuniform landslide motion: 2. Linearized theory and the kinematics of transient response. J. Geol. 349–364.*
- ✓ *McKean, J. and Roering, J. 2004, Objective landslide detection and surface morphology mapping using high-resolution airborne laser altimetry: Geomorphology 57 (2004) 331–351*
- ✓ *Prokešová, R., Kardoš, M., Tábork, P., Medvedová, A., Stacke, V., Chudy, F., 2014. Kinematic behaviour of a large earthflow defined by surface displacement monitoring, DEM differencing, and ert imaging. Geomorphology 224, 86–101.*
- ✓ *Sultan, H.A., and Seed, H.B., 1967, Stability of sloping core earth dams: American Society of Civil Engineers Proceedings, Journal of the Soil Mechanics and Foundations Division, V. 93, no. SM4, p. 45-68.*
- ✓ *Terzaghi, K. and Peck, R.B., 1967, Soil mechanics in engineering practice (2nd ed.): New York, Wiley, 729 p.*

**Response:** Many thanks for reviewer providing these valuable references. We now add a background section to review these references and address the relationship between our work and the previous work (on Lines: 71-79).

Thanks again for editor's and reviewer's effort on our manuscript!

Best regards,

Zongxing Zou, Huiming Tang, Robert E. Criss, Xinli Hu, Chengren Xiong, Qiong Wu,  
Yi Yuan

1 **A model for interpreting the deformation mechanism of reservoir landslides in the**  
2 **Three Gorges Reservoir area, China**

3 Zongxing Zou<sup>1</sup>, Huiming Tang<sup>1</sup>, Robert E. Criss<sup>2</sup>, Xinli Hu<sup>3</sup>, Chengren Xiong<sup>1</sup>, Qiong  
4 Wu<sup>3</sup>, Yi Yuan<sup>4</sup>

5 <sup>1</sup>Three Gorges Research Center for geo-hazards, China University of Geosciences, Wuhan, 430074,  
6 China

7 <sup>2</sup>Department of Earth and Planetary Sciences, Washington University, One Brookings Drive, Saint  
8 Louis, United States

9 <sup>3</sup>Faculty of Engineering, China University of Geosciences, Wuhan, 430074, China

10 <sup>4</sup>Department of Land and Resources of Hubei Province, Wuhan, 430074, China

11 *Correspondence author: Huiming Tang ([tanghm@cug.edu.cn](mailto:tanghm@cug.edu.cn))*

12

13 **Abstract.** Landslides whose slide surface is gentle near the toe and relatively steep in the middle  
14 and rear part are common in the Three Gorges Reservoir area, China. The mass that overlies the  
15 steep part of the slide surface is termed the “driving section” and that which overlies the gentle part  
16 of the slide surface is termed the “resisting section”. A driving-resisting model is presented to  
17 elucidate the deformation mechanism of reservoir landslides of this type, as exemplified by Shuping  
18 landslide. More than 13 years of field observations that include rainfall, reservoir level and  
19 deformation show that the deformation velocity of Shuping landslide depends strongly on the  
20 reservoir level but only slightly on rainfall. Seepage modelling shows that the landslide was  
21 destabilized shortly after the reservoir was first impounded to 135 m, which initiated a period of  
22 steady deformation from 2003 to 2006 that was driven by buoyancy forces on the resisting section.  
23 Cyclical water-level fluctuations in subsequent years also affected slope stability, with annual  
24 “jumps” in displacement coinciding with drawdown periods that produce outward seepage forces. In  
25 contrast, the inward seepage force that results from rising reservoir levels stabilizes the slope, as  
26 indicated by decreased deformation velocity. Corrective transfer of earth mass from the driving  
27 section to the resisting section successfully reduced the deformation of Shuping landslide, and is a  
28 feasible treatment for huge reservoir landslides in similar geological settings.

29 **Keywords:** Three Gorges Reservoir, Reservoir landslide, Water level fluctuation, Deformation  
30 mechanism, Shuping landslide

31

## 32 **1 Introduction**

33 Reservoir landslides attract wide attention as they can cause huge surge waves and other  
34 disastrous consequences (Huang et al., 2017; Wen et al., 2017; Froude and Petley, 2018). The surge  
35 wave produced by the 1963 Vajont landslide in Italy destroyed Longarone village and caused nearly  
36 2,000 fatalities (Paronuzzi and Bolla, 2012). A similar surge associated with the 2003 Qianjiangping  
37 landslide, which slipped shortly after the Three Gorges Reservoir (TGR) in China was first  
38 impounded, capsized 22 fishing boats and took 24 lives (Xiao et al., 2007; Tang et al., 2019). To  
39 ensure the safety of the reservoir, 1.5 billion US dollars have been invested to reinforce the reservoir  
40 banks in TGR. However, reinforcement structures are costly and difficult to construct, and thus many  
41 huge reservoir landslides have not been treated (Wang and Xu, 2013). Many remain in a state of  
42 continuous deformation, such that cumulative monitored displacements of several meters are now  
43 documented at the Huangtupo (Tang et al., 2015; Dumperth et al., 2016), Outang (Yin et al., 2016),  
44 and Baishuihe (Li et al., 2010; Du et al., 2013) landslides. Additional study of the deformation and  
45 failure mechanisms, and risk reduction strategies of these huge reservoir landslides is of great  
46 significance.

47 Most research on the deformation or failure mechanism of reservoir landslides involves  
48 numerical modelling, physical model testing, or field observation. Many numerical simulations have  
49 studied how landslide geometry, material permeability, variation rate of water level and pressure  
50 variation influence the stability of reservoir landslides (Rinaldi and Casagli, 1999; Lane and Griffiths,  
51 2000; Liao et al., 2005; Cojean and Cai, 2011; Song et al., 2015). Both small-scale (Junfeng et al.,

52 2004; Hu et al., 2005; Miao et al., 2018) and large-scale physical model experiments (Jia et al., 2009)  
53 have been conducted to investigate the deformation features of reservoir landslides related to water  
54 level change. Casagli et al. (1999) and Rinaldi et al. (2004) monitored the pore water pressure in  
55 riverbanks to determine its effect on bank stability.

56 Since the impoundment of TGR, monitoring systems have been installed on or within many  
57 reservoir landslides (Ren et al., 2015; Huang et al., 2017; Song et al., 2018; Wu et al., 2019), which  
58 provide valuable data for the study of their deformation features. Many studies show that reservoir  
59 water level variations and rainfall are the most critical factors that govern the stability and  
60 deformation velocities of reservoir landslides in TGR (Li et al., 2010; Tang et al., 2015; Ma et al.,  
61 2016; Wang et al., 2014). These phenomena are more obvious in the landslides with lower  
62 permeability and in the situations of rapid drawdown and heavy rainfall. In the low permeability  
63 landslide, the groundwater is not easy to be discharged from the slope in the process of rapid  
64 drawdown and rainfall infiltration, which results in the formation of pressure difference between  
65 inside and outside of the landslide and reduces the stability of the landslide. However, the effects of  
66 rainfall and reservoir level are difficult to distinguish because the period of TGR drawdown is  
67 managed to coincide with the rainy season. Detailed deformation studies that incorporate long-term  
68 continuous monitoring data are needed to quantify how periodic water-level variations affect  
69 reservoir landslides. Moreover, the evolutionary trend of these deforming landslides and feasible  
70 treatments for these huge reservoir landslides are rarely studied.

71 Many researchers have noticed that different parts of the slide mass play different role in the

72 landslide stability. Terzaghi and Peck (1967), Sultan and Seed (1967) presented wedge method for  
73 analyzing landslides consisting of an active driving wedge and resisting block. Hutchinson (1984)  
74 presented an "influence-line" approach for assessing effectiveness of cuts and fills in stabilizing  
75 slopes. Baum and Fleming (1991) derived expressions for the boundary between driving and  
76 resisting elements of landslides for a shallow landslide. Iverson (1986), McKean and Roering (2004),  
77 Guerriero et al. (2014), Prokesova et al. (2014), and Handwerger et al. (2015) have further explored  
78 the influence of slip surface and landslide geometry on landslide deformation, force distribution and  
79 landslide dynamics. These works provide a new perspective for the study of reservoir landslide.

80 This study presents a model combined with seepage simulations to elucidate how reservoir  
81 landslides deform, using the Shuping landslide as an example. The new environmental and  
82 deformation data provided here extend the observational period for this landslide to more than 13  
83 years, and include results that confirm the effectiveness of a control strategy that have been  
84 implemented.



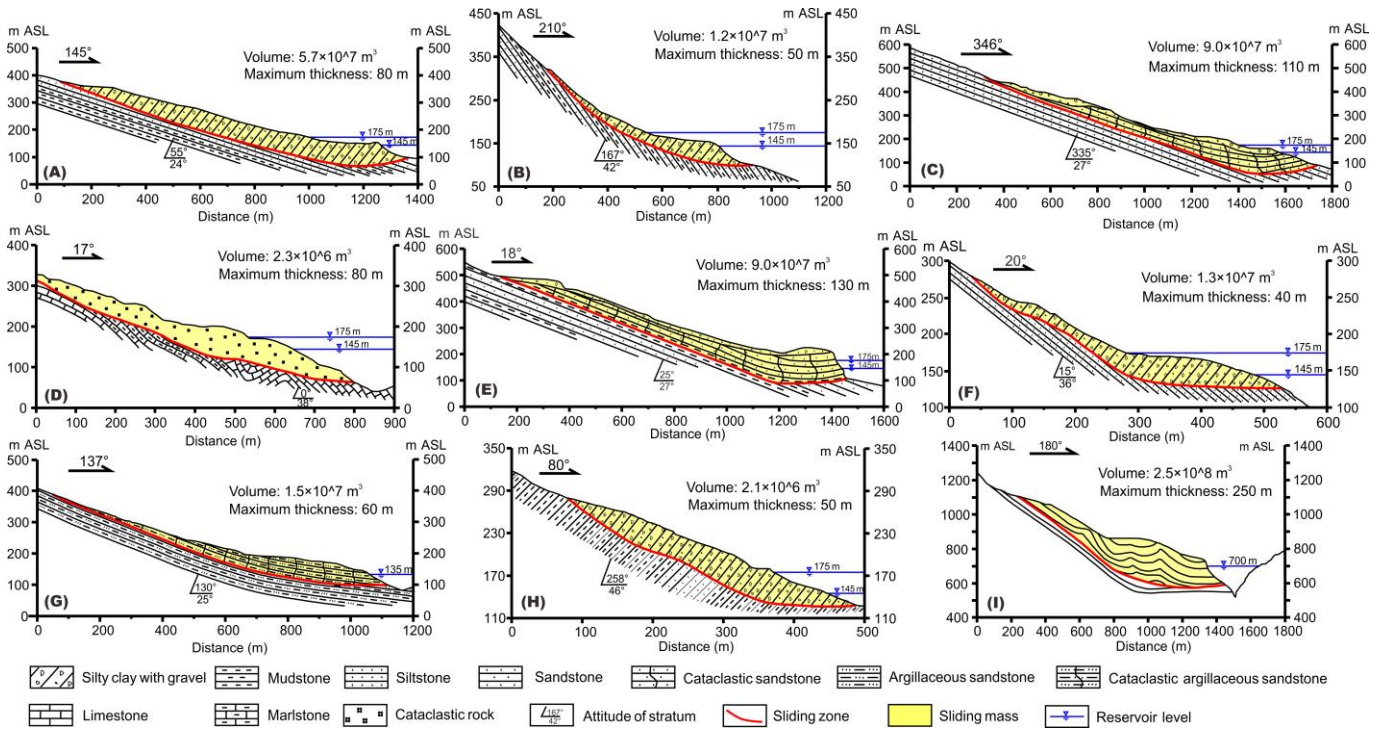

85

86

87

88

89

90

91

**Fig. 1** Geological profiles for typical reservoir landslides, all in the TGR except Vajont in Italy (I). (A) Jiuxianping landslide (Wang, 2013); (B) Xicheng landslide (Song, 2011); (C) Outang landslide (Yin et al., 2016); (D) No.1 riverside slump of Huangtupo landslide (Wang et al., 2014); (E) Muyubao landslide (Lu, 2012); (F) Baishuihe landslide (Lu, 2012); (G) Qiangjiangping landslide (Xiao et al., 2007); (H) Ganjuyuan landslide (Qin, 2011); (I) Vajont landslide, the world famous reservoir-induced landslide in Italy (Paronuzzi and Bolla, 2012). See Fig. 2 for locations.

## 92 2 A geomechanical model for reservoir-induced landslide

### 93 2.1 Typical reservoir-induced landslides in the Three Gorges Reservoir

94 Figure 1 and Fig. 2 summarize the reservoir landslides of most concern in the TGR plus the  
95 world famous Vajont landslide. These landslides have many common features. First, all these  
96 landslides have large volumes, ranging from millions of cubic meters to tens of millions of cubic  
97 meters, and all are difficult to reinforce by conventional structures such anti-slide pile, retaining wall  
98 etc. Second, the front part of the slide mass is always thicker than the rear part, with a maximum  
99 thickness from 40 m to over 100 m. Another important feature of these profiles (Fig. 1) is that the  
100 slope of the slide surface decreases gradually from the rear to the front and may become horizontal  
101 or even anti-dip in the front. Last, these landslides were reactivated after the reservoir impoundment,  
102 with large observed deformations indicating their metastable situation. All these features are relevant  
103 to the deformation behavior of reservoir landslides, as discussed below.

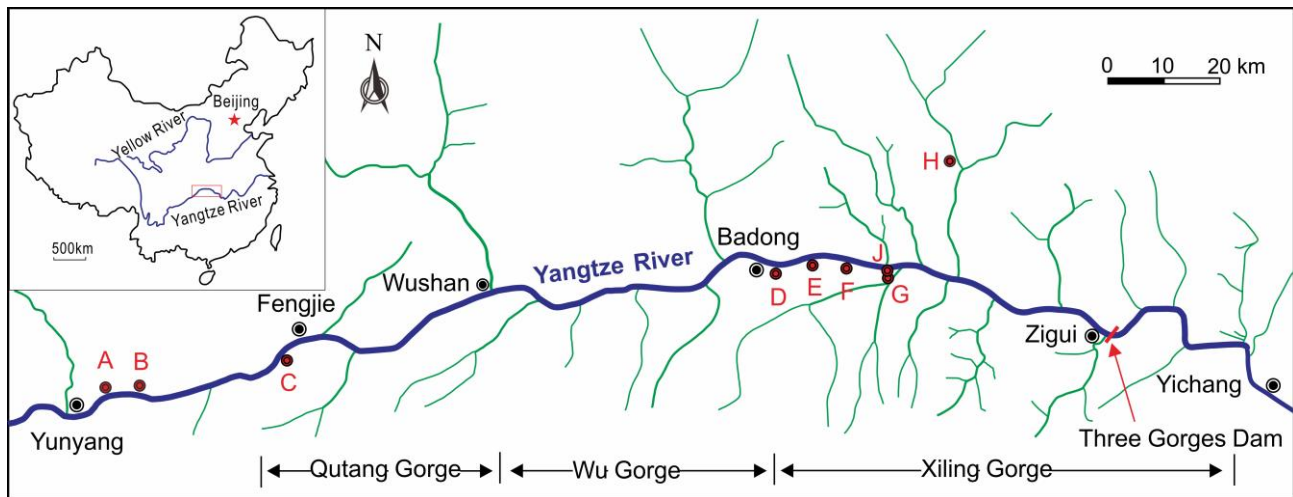

104  
105 **Fig. 2** Location map for important landslides in TGR. Jiuxianping landslide (A); Xicheng landslide  
106 (B); Outang landslide (C); Huangtupo landslide (D); Muyubao landslide (E); Baishuihe landslide (F);  
107 Qiangjiangping landslide (G); Ganjuyuan landslide (H); Shuping landslide (J), Case study.

108 **2.2 Driving-resisting model**

109 Due to the relatively high slope of the slide surface in the middle and rear part, the slide force  
110 exceeds the resistance force on the proximal slide surface, producing extra thrust on the lower-front  
111 slide mass. Consequently, the rear-upper is termed the “driving section” (Fig. 3). In contrast, the  
112 potential slide surface underlying the lower-front part of the slide mass provides more resistance due  
113 to the relatively gentle slide surface slope and greater thickness of the slide mass. The lower-front  
114 part of the slide mass is termed the “resisting section” (Fig. 3), as it blocks the driving section,  
115 thereby playing a critical role in landslide stability (Tang et al., 2015).

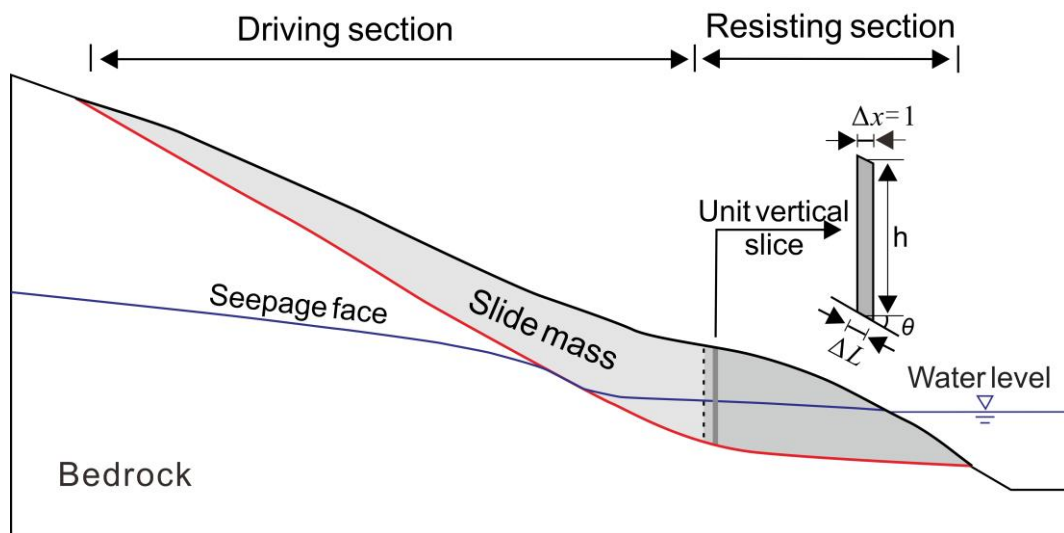

116

117 **Fig. 3** Driving-resisting model for reservoir landslide

118 The resisting section is defined as the lower-front part of the slide mass, where each unit vertical  
119 slice (Fig. 3) can be self-stabilized under its self-weight. According to the limit equilibrium method  
120 and the definition of the resisting section, the sliding force of each vertical slice is the component of  
121 its gravitational force along the slide surface, which cannot exceed the shear resistance provided by  
122 the base. The special position where the sliding force of the vertical slice equals the resistance force

123 provided by the slide surface is regarded as the boundary between the driving and **resisting** sections.  
 124 **In the unit vertical slice of locking section, the difference between the forces on the two vertical sides**  
 125 **is very tiny because the width of the unit vertical slice is very small, and the slide surface underlying**  
 126 **the lower-front part of the slide mass is relatively gentle; so the interslice forces were ignored for**  
 127 **convenience of analysis.** Force balance along the sliding direction for this special vertical slice can  
 128 be written as

$$129 \quad w \sin \theta_1 = w \cos \theta_1 \tan \varphi + c \Delta L \quad (1)$$

130 where  $w$  is the weight of the unit vertical slice;  $\theta_1$  is the slope angle of the slide surface at the  
 131 boundary between the driving and **resisting** sections;  $\Delta L$  is the length of the slice base (see Fig. 3);  
 132 and  $c$  and  $\varphi$  are the cohesion and internal friction angle of the slide surface, respectively.

133 The weight of the slice  $w = \gamma h \Delta x$ , where  $\gamma$  is the unit weight of the slide mass,  $h$  is the vertical  
 134 distance from the center of the base of the slice to the ground surface,  $\Delta x$  is the unit width of the slice,  
 135 and  $\Delta L = \Delta x / \cos \theta_1$  (Fig. 3). Thus Eq. (1) can be rewritten as

$$136 \quad \tan \theta_1 = f + k / \cos^2 \theta_1 \quad (2)$$

137 where  $f = \tan \varphi$ ,  $k = c / \gamma h$ .

138 The solution to Eq. (2) provides the slope angle  $\theta_1$  of the slide surface:

$$139 \quad \theta_1 = 0.5 \arcsin T \quad (3)$$

$$140 \quad \text{where } T = \frac{(2k + f) + \sqrt{(2k + f)^2 - 4k(k + f)(1 + f^2)}}{1 + f^2}$$

141 Empirical values for the cohesion of the slide surface is less than 40 kPa, while the internal  
 142 friction angle of the slide surface varies between  $10^\circ$  and  $25^\circ$  (Chang et al., 2007), and the unit

143 weight of the soil is typically about  $20 \text{ kN/m}^3$ . In order to further elucidate the effect of various  
 144 parameters on the length of the **resisting** section, contour maps of  $\theta_1$  under different shear strength  
 145 parameters  $c$  and  $\phi$  and the thickness of the slide mass  $h$  are plotted (Fig. 4), as derived from Eq. (3).

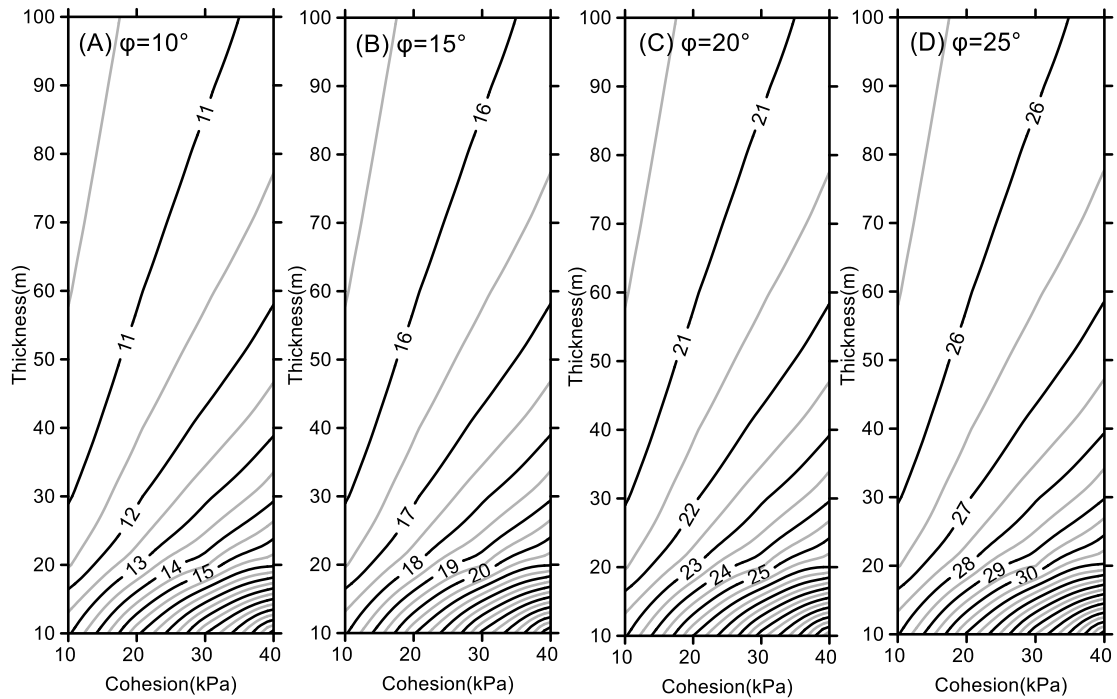

146  
 147 **Fig. 4** Coutour maps for the slope angle  $\theta_1$  of slide surface that denotes the boundary between the  
 148 driving and **resisting** sections under various shear strength parameters and slide mass thickness.

149 Figure 4 shows that  $\theta_1$  increases as the internal friction angle  $\phi$  increases; however, by  
 150 comparison of the pattern and the values of the contour in the four sub-figures, the difference  
 151 between  $\theta_1$  and  $\phi$  has little relationship to  $\phi$ . Due to the effect of cohesion,  $\theta_1$  is always larger than  $\phi$   
 152 as shown in Fig. 4. As the cohesion  $c$  decreases, the difference between  $\theta_1$  and  $\phi$  decreases, and for  
 153 cohesionless material with  $c=0$ ,  $\theta_1$  is equal to  $\phi$ . Fig. 4 also shows that when the thickness of the slide  
 154 mass reaches about 40 m, the difference between  $\theta_1$  and  $\phi$  is very small (less than  $3^\circ$ ), which  
 155 becomes even less as the thickness increases. These results indicate that for the thick slide mass (up

156 to 40 m), the boundary between the **resisting** and driving sections can be approximated as the  
 157 position where the slope angle  $\theta_1$  equals the internal friction angle  $\varphi$ .

### 158 2.3 Effect of water force on the **resisting** and driving sections

159 The impacts of the water level change on the reservoir slope stability can be quantified by  
 160 analyzing the changes in water force on the slope. Lambe and Whitman (2008) have demonstrated  
 161 that the water forces acting on an element of the slope can be equivalently expressed by either the  
 162 ambient pore-water pressure (Fig. 5A) or by seepage and buoyancy forces (Fig. 5B). The latter form,  
 163 i.e., seepage and buoyancy forces, are employed here to clarify the mechanical mechanism of water  
 164 force on the reservoir bank.

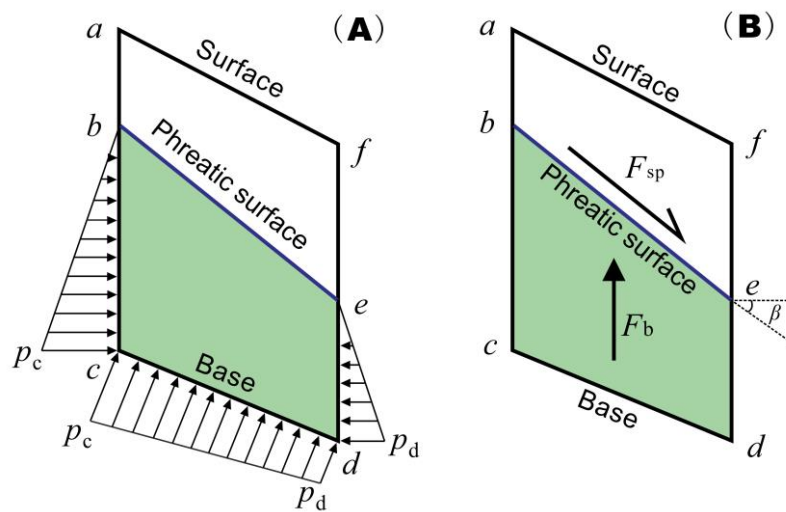

165  
 166 **Fig. 5** Two equivalent ways to display the water force acting on a slice of the slide mass. (A)  
 167 expressed by pore-water pressure; (B) expressed by the seepage force  $F_{sp}$  and the buoyancy force  $F_b$ .

168 The seepage force ( $F_{sp}$ ) represents the frictional drag of water flowing through voids that is  
 169 proportional to the hydraulic gradient and acts in the direction of flow. It can be expressed as (Lambe  
 170 and Whitman, 2008)

171 
$$F_{sp} = \gamma_w i V \quad (4)$$

172 Where  $\gamma_w$  is the unit weight of water;  $i$  is the hydraulic gradient and equals  $\sin\beta$  where  $\beta$  is the slope  
 173 angle of the phreatic surface;  $V$  is the submerged volume of the analyzed element as the trapezoid  
 174 area enclosed by points  $bcd e$  in Fig. 5.

175 When the groundwater flows outwards as occurs during reservoir level drops, the corresponding  
 176 outward seepage force decreases the slope stability. In contrast, the seepage force will be directed  
 177 inward during reservoir level rise, increasing slope stability.

178 The buoyancy force ( $F_b$ ) of the water exerted on the element can be expressed as

179 
$$F_b = \gamma_w V \quad (5)$$

180 The factor of safety ( $Fos$ ) used to quantify the slope stability can be defined as the ratio of the  
 181 shear strength (resistance,  $F_r$ ) along the potential failure surface to the sliding force ( $F_s$ ) by the  
 182 Mohr-Coulomb failure criterion (Wang et al., 2014):

183 
$$Fos = \frac{F_r}{F_s} = \frac{\sum_{j=1}^n [c\Delta L_j + N_j \tan \varphi]}{\sum_{j=1}^n w_j \sin \theta_j} \quad (6)$$

184 where  $n$  is the total number of slices;  $N$  is the normal force on the base of each slice, and the other  
 185 symbols are as above. Suppose that the variation of the effective slide mass weight in a slice is  $\Delta w$ ,  
 186 due to the change of buoyancy force, which thereby modifies the resistance and sliding forces by  $\Delta F_r$   
 187 and  $\Delta F_s$  respectively. The corresponding change of the factor of safety  $\Delta Fos$  is:

188 
$$\Delta Fos = \frac{F_r + \Delta F_r}{F_s + \Delta F_s} - \frac{F_r}{F_s} = \frac{\Delta F_r * F_s}{(F_s + \Delta F_s) F_s} \left( 1 - \frac{Fos}{\Delta F_r / \Delta F_s} \right) \quad (7)$$

189 The ratio of  $\Delta F_r$  to  $\Delta F_s$  for a vertical slice due to the change of its effective weight  $\Delta w$  is

190 approximately:

$$191 \quad \frac{\Delta F_r}{\Delta F_s} = \frac{\Delta w \cos \theta \tan \varphi}{\Delta w \sin \theta} = \frac{\tan \varphi}{\tan \theta} \quad (8)$$

192 Suppose that  $\theta_2 = \arctan\left(\frac{\tan \varphi}{F_{os}}\right)$ , where the change of the vertical slice weight has no influence  
193 on the current stability ( $\Delta F_{os}=0$ ). If  $\theta < \theta_2$  and  $\Delta w > 0$ , then  $\Delta F_{os} > 0$ , indicating that increase of the  
194 weight of lower-front part of the slide mass where its slope angle of the slide surface  $\theta$  is less than  $\theta_2$   
195 will improve the stability of the whole slide mass; conversely, decrease of the weight of the  
196 lower-front part would decrease stability. In contrast, the upper-rear part has a contrary tendency. As  
197 mentioned above, continuously deformed reservoir landslides are metastable and their corresponding  
198  $F_{os}$  is around 1; hence  $\theta_2 \approx \varphi$ . Consequently, in the cases that reservoir landslide is under metastable  
199 state and has a thickness up to 40 m,  $\theta_1 \approx \theta_2 \approx \varphi$ , the **resisting** section and driving section have the same  
200 mechanical behavior as described above. Either an increase in the weight of the **resisting** section or a  
201 decrease in the weight of the driving section will improve the stability of the slope and vice versa.

202 In summary, the effect of ground water on the slope or landslide stability can be resolved into a  
203 seepage force and a buoyancy force. The effect of the seepage force on slope stability depends on the  
204 direction and magnitude of flow. Buoyant forces change the effective weight of the slide mass and  
205 have contrary effect on the **resisting** and driving sections. On the basis of these rules, the mechanical  
206 mechanism for reservoir-induced landslide can be illustrated as Fig. 6.



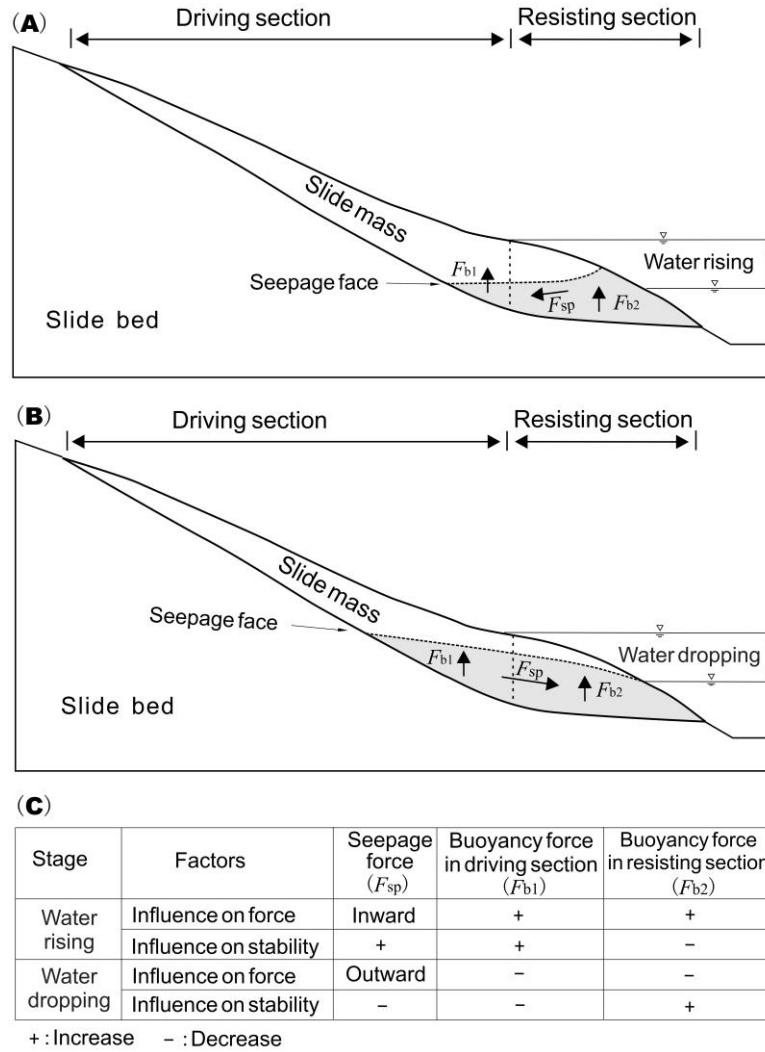

207

208 **Fig. 6** Mechanical mechanism for reservoir-induced landslide. (A) water level rise; (B) water level  
 209 drop; (C) effects of various mechanisms on the landslide stability during water level rise and drop.

210 **3 Shuping landslide**

211 Shuping landslide is located in Shazhenxi Town, Zigui County, Hubei Province, on the south  
 212 bank of the Yangtze River, 47 km upstream from the Three Gorges dam (Fig. 2). After the first  
 213 impoundment of the reservoir in 2003, serious deformation was observed that endangered 580  
 214 inhabitants and navigation on the Yangtze River (Wang et al., 2007). Previous studies of the Shuping  
 215 landslide utilized GPS extensometers (Wang et al., 2007), or field surveys (Lu et al., 2014) to clarify

216 the deformation. This study provides a detailed geomechanical model that includes seepage and  
217 buoyancy effects to clarify the deformation mechanism of this landslide which is calibrated by  
218 long-term monitoring data.

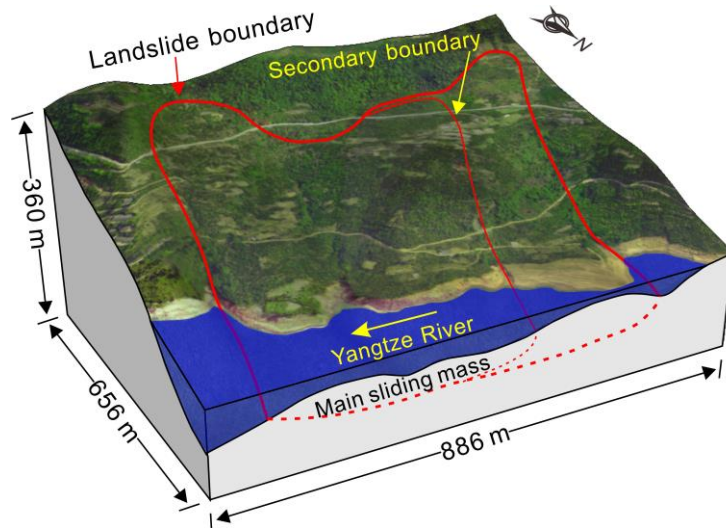

219

220 **Fig. 7** Full view of Shuping landslide (the surface satellite map © Google Maps).

### 221 3.1 Geological setting

222 The Shuping landslide is a chair-shaped slope that dips  $20^\circ$  to  $30^\circ$  to the north, toward the  
223 Yangtze River (Fig. 7). The landslide is bounded on the east and west by two topographic gutters.  
224 The altitude of its crown is 400 m above sea level (ASL), while its toe is about 70 m ASL, which is  
225 now submerged by the reservoir, level of which varies annually between 145 and 175 m ASL (Fig. 8).  
226 Borehole and inclinometer data (Lu et al. 2014) indicate that there are two major slide surface within  
227 the west part of the slope and the upper rupture zone divides the slide mass into two parts (see Fig. 7).  
228 The whole slide mass has a thickness of 30-70 m, a N-S length of about 800 m and W-E width of  
229 approximately 700 m, constituting a total volume of  $\sim 27.5$  million  $\text{m}^3$ , of which 15.8 million  $\text{m}^3$   
230 represents the main slide mass.

231 Shuping landslide is situated on an anti-dip bedrock of marlstone and pelitic siltstone of the  
 232 Triassic Badong Group ( $T_2b$ ) (Fig. 9). The upper part of the slide mass is mainly composed of yellow  
 233 and brown silty clay with blocks and gravels, while the lower part of the slide mass mainly consists  
 234 of dense clay and silty clay with gravels, with a thickness of about 50 m on average. The deep  
 235 rupture zone is a 0.6~1.7 m layer that extends along the surface of bedrock, and consists of  
 236 yellowish-brown to steel gray silty clay. The upper rupture zone in the west part has similar  
 237 composition and has an average thickness of 1.0-1.2 m. The dip angle of the slide surface decreases  
 238 gradually from the rear to the front (Fig. 9), so the driving-resisting model is appropriate for Shuping  
 239 landslide. Before reservoir impoundment, boreholes ZK17 and ZK18 were dry but borehole ZK14  
 240 contained groundwater near the rupture zone.

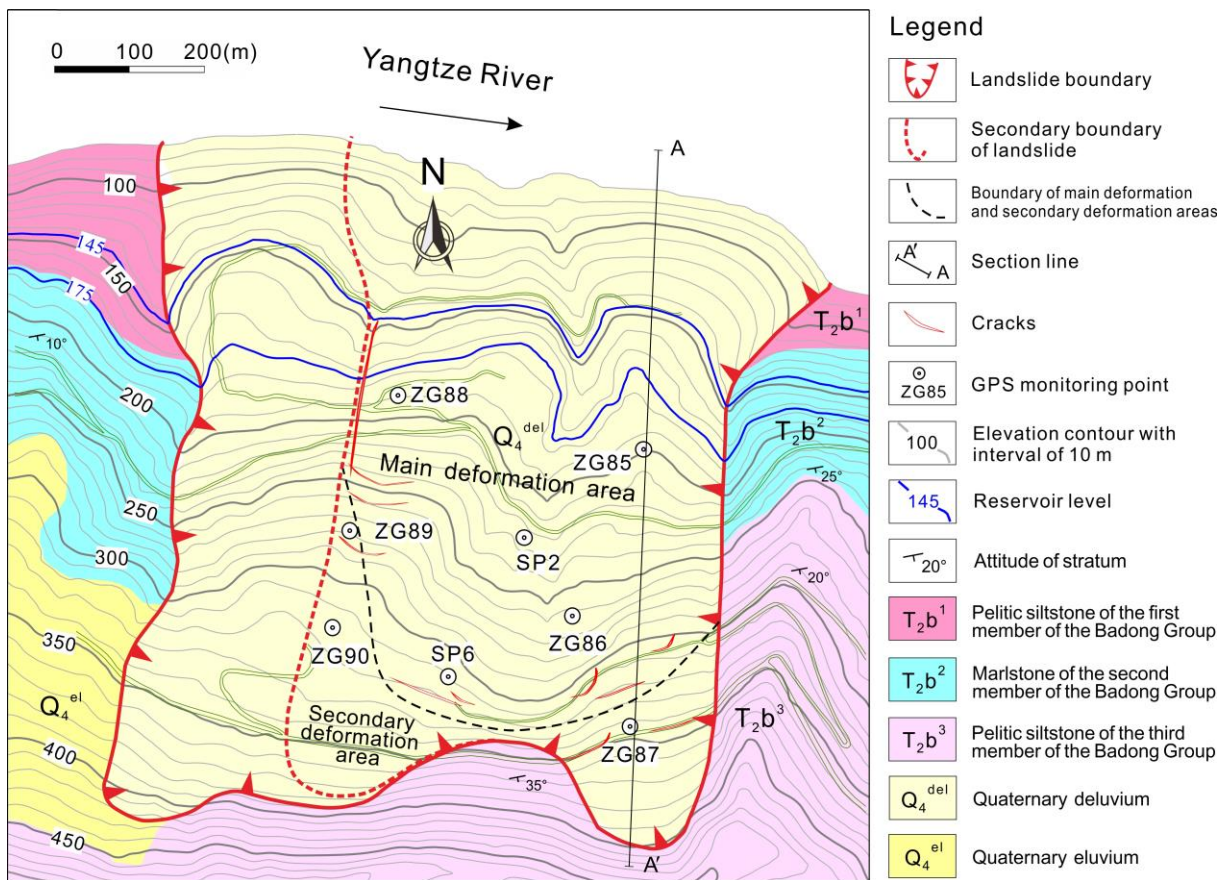

241  
 242 **Fig. 8** Engineering geology map of Shuping landslide

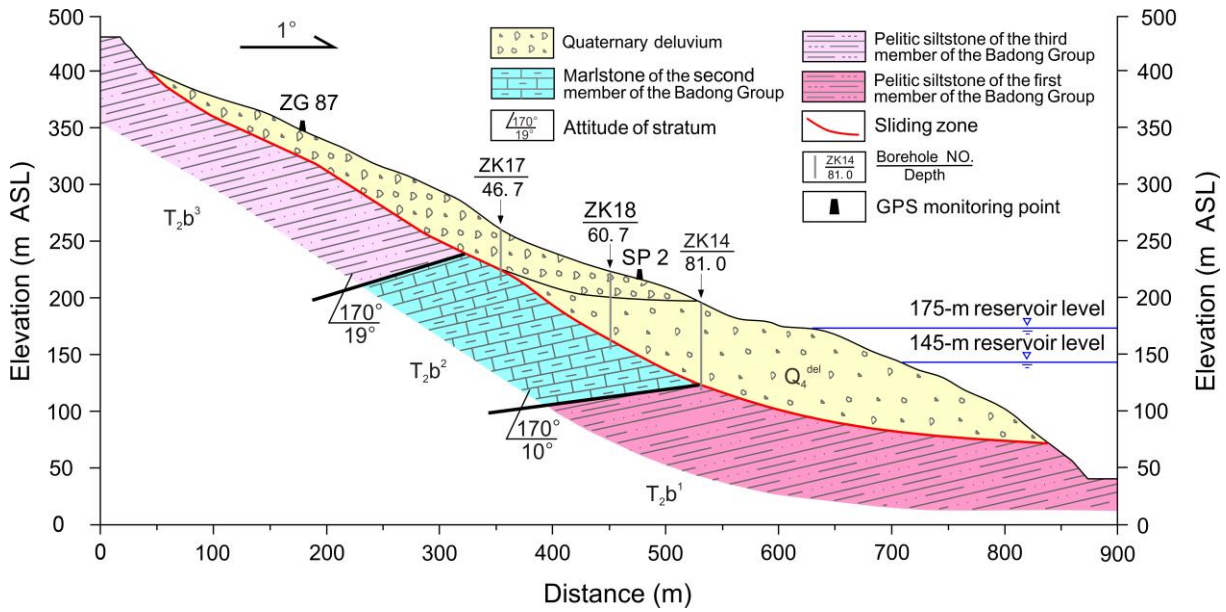

243  
244 **Fig.9** Geological profiles along section A-A' as shown in Fig. 8

245 **3.2 Monitoring instrumentation**

246 The displacement monitoring system of Shuping landslide consists of 11 global positioning  
 247 system (GPS) survey points, three of which are datum marks that were installed on stable ground  
 248 outside the landslide area with the remainder being on the main slide mass (Fig. 8). Seven of the GPS  
 249 monitoring points (SP2, ZG85, ZG86, ZG87, ZG88, ZG89 and ZG90) were set in June 2003 and  
 250 GPS monitoring points SP6 was set in August 2007. All the GPS monitoring points were surveyed  
 251 every half month, and the system was upgraded to automatic, real-time monitoring in June 2012. The  
 252 daily rainfall records are obtained from the Meteorological Station near the Shuping landslide  
 253 (source: <http://cdc.nmic.cn/>). Daily reservoir level is measured by China Three Gorges Corporation  
 254 (source: <http://www.ctg.com.cn/inc/sqsk.php>).

255 **3.3 Engineering activity**

256 The evolution of Shuping landslide is related to four stages of human activity (Fig. 10). The first  
 257 stage was the 139 m ASL trial reservoir impoundment (from April 2003 to September 2006). The  
 258 reservoir water level was lifted from 69 to 135 m ASL and then changed between 135 and 139 m  
 259 ASL. The second stage was 156 m ASL trial reservoir impoundment (from September 2006 to  
 260 September 2008). The reservoir water level was raised from 139 to 156 m ASL, and then varied  
 261 annually between 145 and 156 m ASL. The third stage was 175 m ASL trial reservoir impoundment.  
 262 This stage began when the reservoir water level was raised to 175 m ASL, and thereafter managed to  
 263 annually varied between 145 and 175 m ASL (Tang et al., 2019). During the fourth stage, an  
 264 engineering project for controlling the deformation of Shuping landslide was conducted in  
 265 September 2014 and completed in June 2015 (see Section 6 for details).

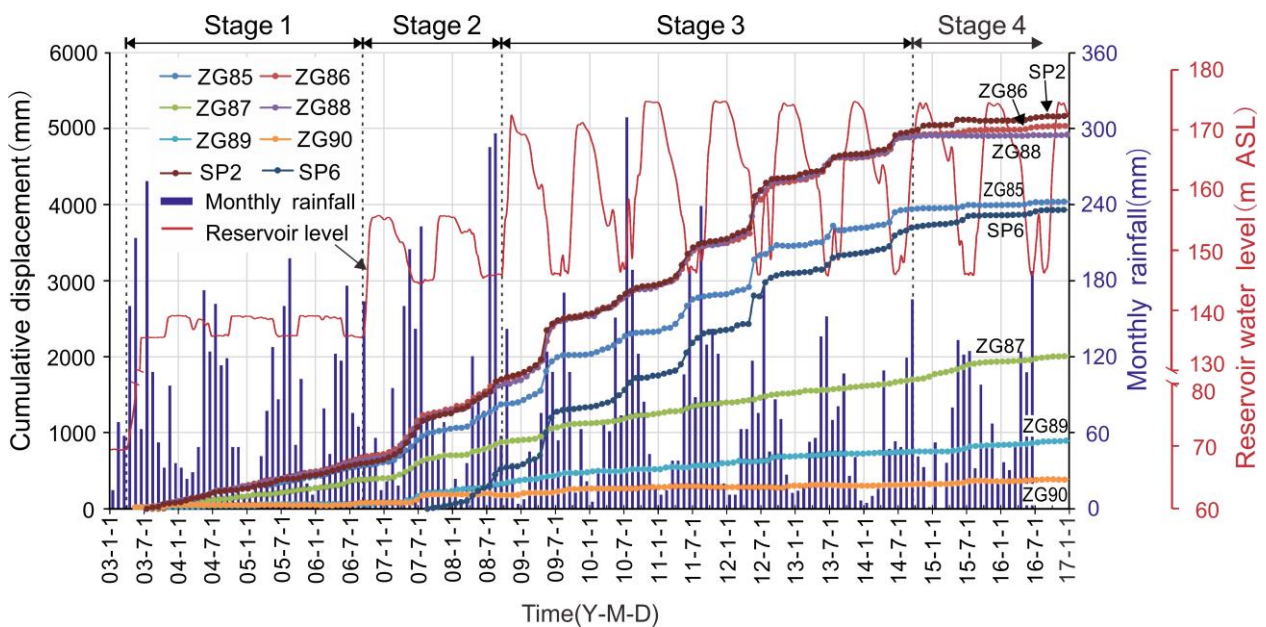

266

267

**Fig. 10** Monitoring data for Shuping landslide from 2003 to 2016.

## 268 **4 Field observational results**

### 269 **4.1 Overall deformation feature**

270 According to the deformation features revealed by the GPS monitoring system (Fig. 10, Fig. 11)  
271 and field investigations, the main slide mass can be divided into a main deformation area and a  
272 secondary deformation area (Fig. 8). The main deformation area underlies most of the area and has a  
273 cumulative displacement up to 4-5 m, as measured at sites ZG85, ZG86, ZG88, SP2 and SP6. During  
274 the 13-year monitoring period point SP2 underwent the largest cumulative displacement (5.168 m),  
275 followed by ZG86 and ZG88 which recorded 5.039 m and 4.919 m, respectively. Deformations were  
276 essentially synchronous at the monitoring sites as indicated by the similar shape of their cumulative  
277 displacement curves, which typically show steady rises in the first impoundment stage, step-like  
278 trends in the second and third impoundment stages, and flat trends after the engineering treatment.  
279 Deformations were smaller and steadier in the secondary deformation area, as indicated by gentle  
280 cumulative displacement curves at ZG89, ZG90, and ZG87, which recorded cumulative  
281 displacements of 0.5-2 m during 2003 to 2016.

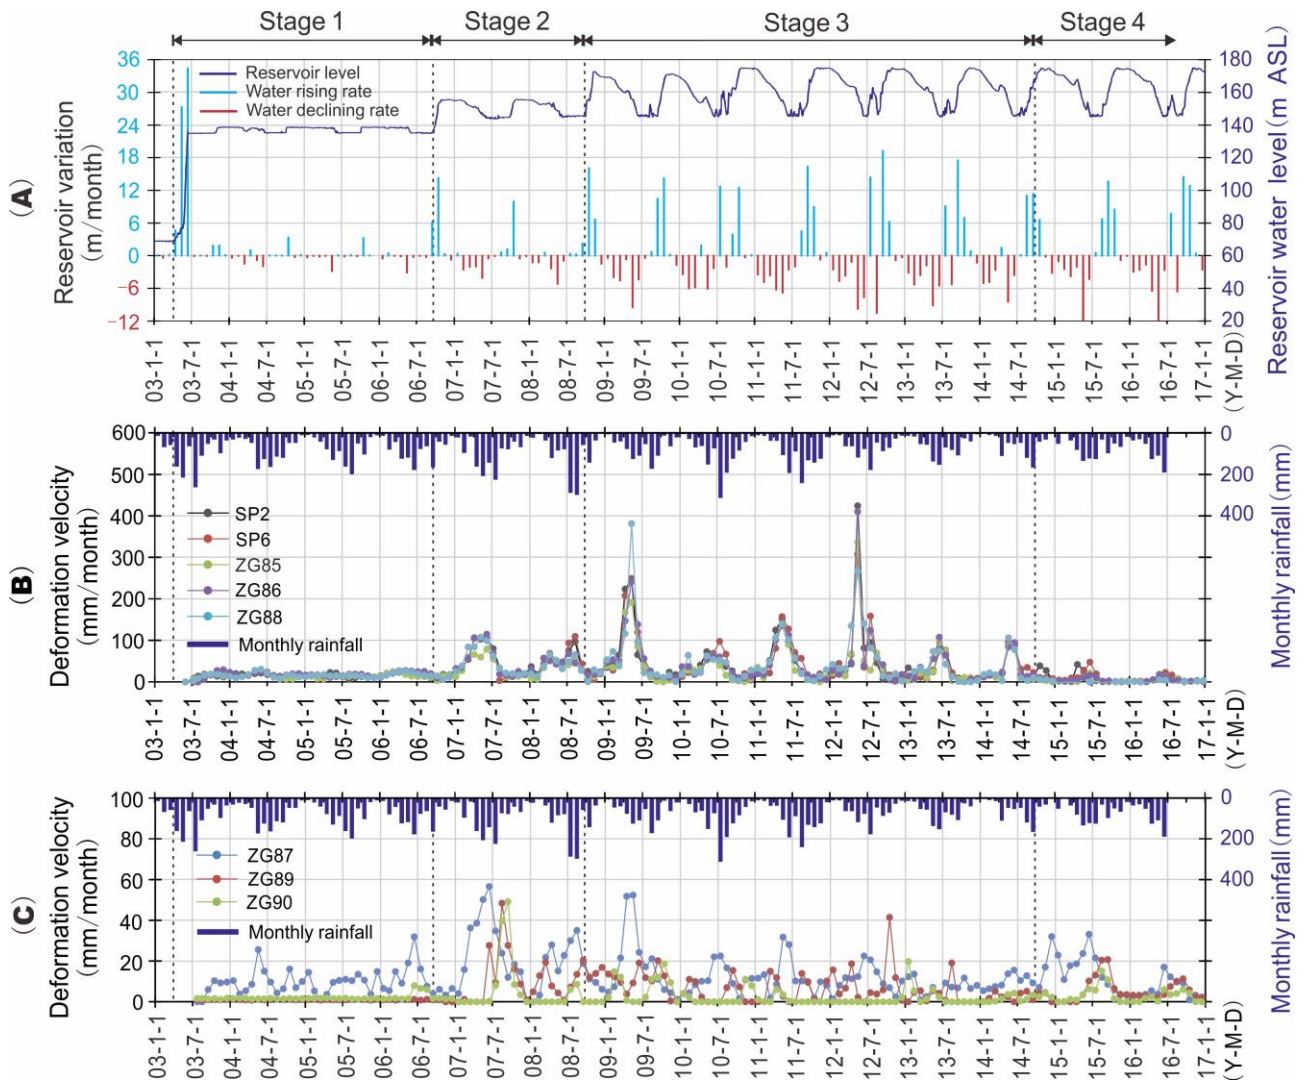

282

283 **Fig. 11** Time series of reservoir level, rainfall and landslide displacement from 2003 to 2016. (A)  
 284 Reservoir water levels and variation rates (positive for level rise, negative for level drop); (B)  
 285 Deformation velocity of the GPS points in the main deformation area and monthly rainfall; (C)  
 286 Deformation velocity of the GPS points in secondary deformation area and monthly rainfall.

287

#### 4.2 Deformation feature in different stages

288

After the reservoir level first rose to 135 m ASL in June 2003, the main deformation area

289

deformed at an average velocity of 15.6 mm/month until September 2006, with each site recording

290

rather steady displacement curves whose tiny or nonexistent steps correspond to the small annual

291 variations in reservoir level. In contrast, no obvious deformation occurred during Stage 1 at ZG89  
292 and ZG90 in the secondary deformation area.

293 During the earliest two months of Stage 2 (September, October 2006), when the reservoir level  
294 first rose to 156 m ASL, deformation velocities of the main deformation area decreased to 13.4 and  
295 9.7 mm/month respectively, indicating that slide mass stability had improved. For the next two  
296 months (November, December) the velocity increased to 11.5 and 14.3 mm/month, as the reservoir  
297 level was steady at 156 m ASL. During the subsequent drawdown period when the reservoir level  
298 dropped to 145 m ASL in 2007, the deformation velocity increased to a maximum of about 100  
299 mm/month (Fig. 11), resulting in an average “jump” of 458 mm in the cumulative displacement  
300 curve, which then became flat while the reservoir remained at 145 m (Fig. 10).

301 During the beginning of Stage 3 when the reservoir first rose to nearly 175m in October 2008,  
302 the deformation velocity of the main deformation area decreased to 12.7 mm/month, compared to 65,  
303 74, 32 mm/month in the previous three months. Shortly after the reservoir rose to its highest level,  
304 the level underwent a gradual decline and the deformation velocity increased steadily. The maximum  
305 deformation velocity reached 378.6 mm/month at ZG88 in May 2009 when the water level declined  
306 rapidly, a rate almost four times higher than when the reservoir dropped from 156 to 145 m ASL in  
307 2007. Then the deformation velocity decreased to a relatively low value when the water level was  
308 steady at 145 m ASL (Fig. 11B).

309 In the subsequent 6 years of Stage 3 the reservoir level underwent a series of similar annual  
310 variations, and the slide mass responded with a series of deformation “jumps”. During these cycles,



311 the deformation velocity decreased as the reservoir rose, maintained low values when the reservoir  
312 remained high, began to increase as drawdown began, and attained the values up to 165 mm/month  
313 when drawdown was rapid. The corresponding cumulative deformation curves featured obvious  
314 “jumps” during drawdown periods, then became relatively flat as the reservoir was maintained at the  
315 low level of 145 m ASL. Clearly, these results show that deformation velocity is high during  
316 reservoir drawdown and low during reservoir rise.

317 After the engineering treatment was completed in June 2015, the “jumps” in the cumulative  
318 displacement curves disappeared and the curves became very flat (Fig. 10). The deformation was  
319 reduced to a low level of 4.1 mm/month in the main deformation area, demonstrating effective  
320 treatment.

#### 321 **4.3 Effect of water-level fluctuation and rainfall on the deformation of Shuping landslide**

322 The largest “jump” in the cumulative displacement curves averaged 479 mm and occurred in  
323 May to June, 2012, while the second was the jump of 458 mm in May to June, 2009. These periods  
324 corresponded with the two highest drawdown rates of 9.67 and 9.38 m/month, respectively (Fig.  
325 11A). During these two years, rainfall amounts were relatively low with monthly maxima of 180  
326 mm/month in 2009 and 190 mm/month in 2012 (Fig. 11). These data clearly demonstrate that the  
327 deformation of Shuping landslide is primarily driven by reservoir level variations and not by rainfall.  
328 This relationship is also confirmed by the low deformation velocities and flat cumulative  
329 displacement curves during the July and August peak of the rainy season, when the reservoir is held  
330 at its lowest level.

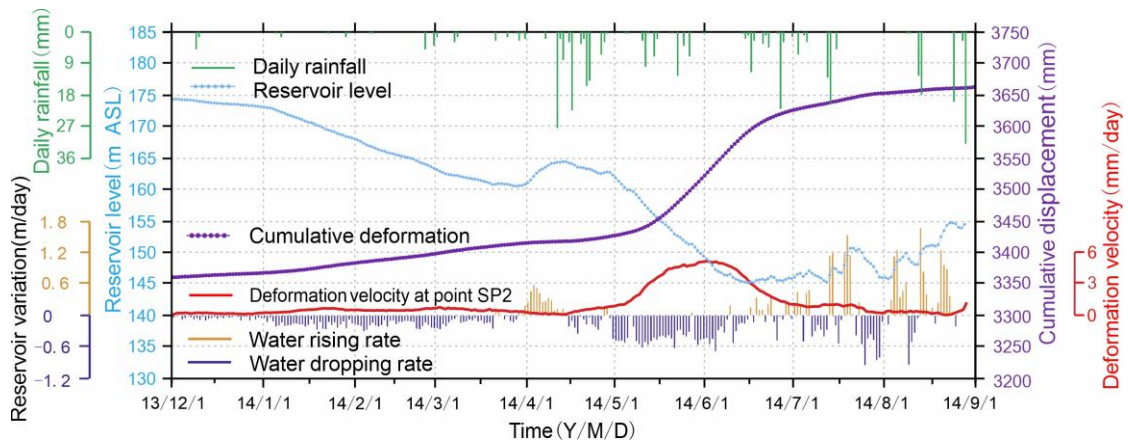

331  
 332 **Fig. 12** Monitoring data of GPS point SP2 on the middle part of slide mass, from December 2013 to  
 333 September 2014.

334 Figure 12 clarifies the influence of reservoir level and rainfall on landslide deformation. In  
 335 December 2013, the reservoir level dropped at an average rate of 0.041 m/day, and the corresponding  
 336 deformation velocity was 0.22 mm/day. In the subsequent three months, the drawdown rate of the  
 337 reservoir level increased to 0.147 m/day, and the deformation velocity rose to 0.54 mm/day. During  
 338 March 2014, the deformation velocity decreased as the water level increased, even though intense  
 339 rainfalls were recorded during this period (up to 27.5 mm/day). In the following rapid drawdown  
 340 period (0.419 m/day) from May to June, the deformation velocity increased to about 5 mm/day.  
 341 Subsequently, the deformation velocity decreased to less than 1.2 mm/day as the water level  
 342 remained low, although rainfall was abundant. These details confirm that the deformation velocity of  
 343 the Shuping landslide is positively related to the drop rate of the reservoir, with rainfall having little  
 344 effect.

345 Unlike the flat displacement curves and low deformation velocity in other years when the  
 346 reservoir level was steady at the lowest annual level in July and August, deformation velocities were  
 347 large in 2008 and 2010 (65.0 and 73.8 mm/month in July and August 2008; 58.4 mm/month in July

348 2010, about half of the average highest monthly deformation velocity, 165 mm/month, during rapid  
349 draw down period). Very heavy rainfall was recorded during those periods, up to 300 mm/month.  
350 However, August 2011 had the next heaviest rainfall of 250 mm/month, yet the cumulative  
351 displacement curve remained flat and the deformation velocity was low (22.2 mm/month). These  
352 data illustrate that heavy rainfall can decrease landslide stability and accelerate deformation, but  
353 nevertheless is a secondary factor. The difference in the displacement velocity between the months  
354 with the highest (2008, 2010) and the second highest (2011) levels of rainfall suggests that a  
355 threshold exists, with rainfall exceeding this value having a significant effect but with less having  
356 little significance. This threshold appears to be about 250-300 mm/month.

## 357 **5 Numerical simulation**

358 In this section, groundwater flow in the Shuping slope under the variation of the reservoir level  
359 is simulated to assist the driving-resisting model to explain the deformation process of Shuping  
360 landslide. Seepage simulation is performed by the SEEP/W module of GEOSTUDIO software (see  
361 <http://www.geoslope.com>). The deformation state of the landslide is usually regarded as the  
362 performance of the landslide stability state (Wang et al., 2014; Huang et al., 2017). Thus, the *Fos*  
363 (Safety of factor) of the Shuping landslide is calculated with the simulated groundwater level, to  
364 evaluate the stability of the Shuping landslide under various impoundment scenarios. In this study,  
365 the *Fos* of the Shuping landslide is calculated by Morgenstern-Price method (Zhu et al., 2005) using  
366 the SLOPE/W module of GEOSTUDIO software. **The external impoundment load affect is**  
367 **considered by this software.** Different evaluation method for landslide stability will lead to different

368 value of  $Fos$ ; thus we only employ the calculated values of  $Fos$  to investigate the variation trend of  
369 the landslide stability.

370 Figure 13 shows the numerical simulation model of the Shuping landslide, whose framework is  
371 based on the geological profile map in Fig. 9. The slope was divided into six regions composed of  
372 five materials with different properties (Table 1). Zero flux boundary conditions were assigned along  
373 the bottom horizontal and the right vertical boundaries. A constant water head was applied at the left  
374 vertical boundary assuming that it is sufficiently far from the reservoir to not be affected by  
375 reservoir-level variations. A series of inverse modelling tests and water tables at the boreholes were  
376 adopted to determine the constant water head at the left vertical boundary. The optimum water head  
377 at the left boundary is 230 m ASL. The hydrograph of TGR from January 1, 2003 to September 10,  
378 2014 (Fig. 14(A)) and generalized hydrograph of the trial impoundment at 175 m ASL (Fig. 14(B))  
379 were used to define the right boundary adjacent to the reservoir. Initial conditions were defined using  
380 the water tables revealed by boreholes.

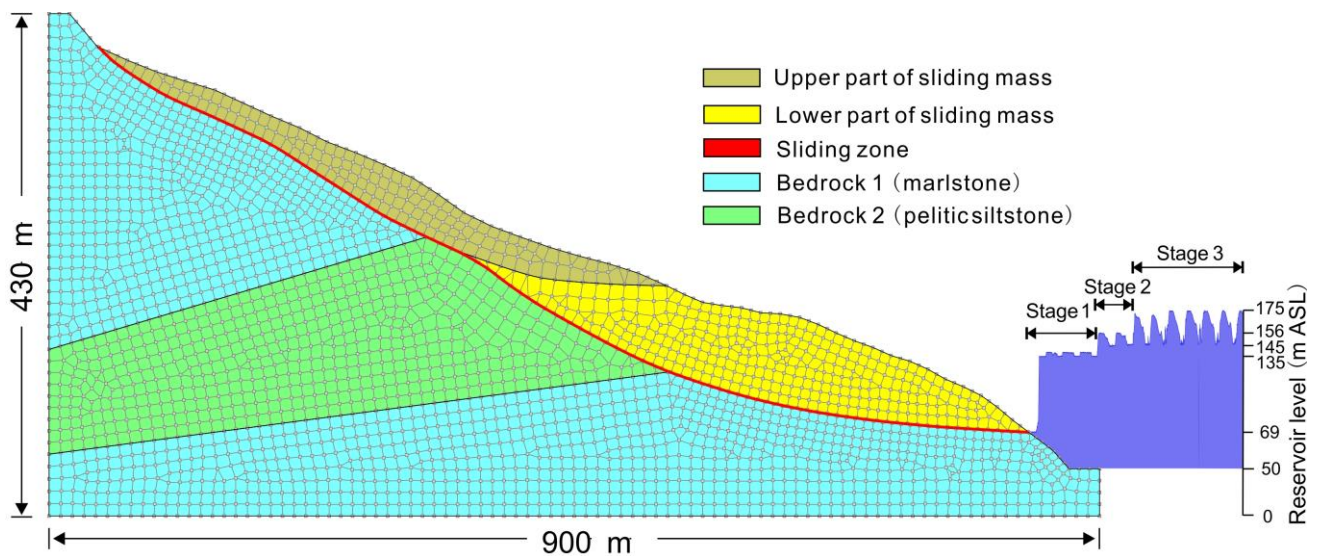

381  
382 **Fig. 13.** Numerical simulation model of seepage for Shuping landslide.

**Table 1** Hydrologic and mechanical properties of Shuping landslide

| Location                 | Material                           | Saturated conductivity $k_s$ (m/day) | Residual volumetric water content $\theta_r$ | Saturated volumetric water content $\theta_s$ | Fitting parameter in the van Genuchten's model $\alpha$ | Fitting parameter in the van Genuchten's model $n$ | Unit weight $\gamma$ (kN/m <sup>3</sup> ) | cohesion $c'$ (kPa) | friction angle $\phi'$ (°) |
|--------------------------|------------------------------------|--------------------------------------|----------------------------------------------|-----------------------------------------------|---------------------------------------------------------|----------------------------------------------------|-------------------------------------------|---------------------|----------------------------|
| Upper part of slide mass | Silty clay with blocks and gravels | 4.95 <sup>a</sup>                    | 0.129                                        | 0.39                                          | 0.141                                                   | 1.869                                              | 20.3 <sup>a</sup>                         | /                   | /                          |
| Lower part of slide mass | Silty clay with gravels            | 3.90 <sup>a</sup>                    | 0.129                                        | 0.39                                          | 0.141                                                   | 1.869                                              | 20.3 <sup>a</sup>                         | /                   | /                          |
| Rupture zone             | Silty clay                         | 2.98*10 <sup>-2</sup> <sub>b</sub>   | 0.08                                         | 0.30                                          | 0.035                                                   | 1.758                                              | /                                         | 25.7 <sup>a</sup>   | 20.4 <sup>a</sup>          |
| Bedrock 1                | Marlstone                          | 1.47*10 <sup>-4</sup> <sub>b</sub>   | 0.05                                         | 0.20                                          | 0.0173                                                  | 1.606                                              | /                                         | /                   | /                          |
| Bedrock 2                | Pelitic siltstone                  | 8.99*10 <sup>-5</sup> <sub>b</sub>   | 0.05                                         | 0.20                                          | 0.0173                                                  | 1.606                                              | /                                         | /                   | /                          |

384 <sup>a</sup> Provided by Hubei Province Geological Environment Terminus (2003)

385 <sup>b</sup> Values of similar material from literature (Hu et al., 2015)

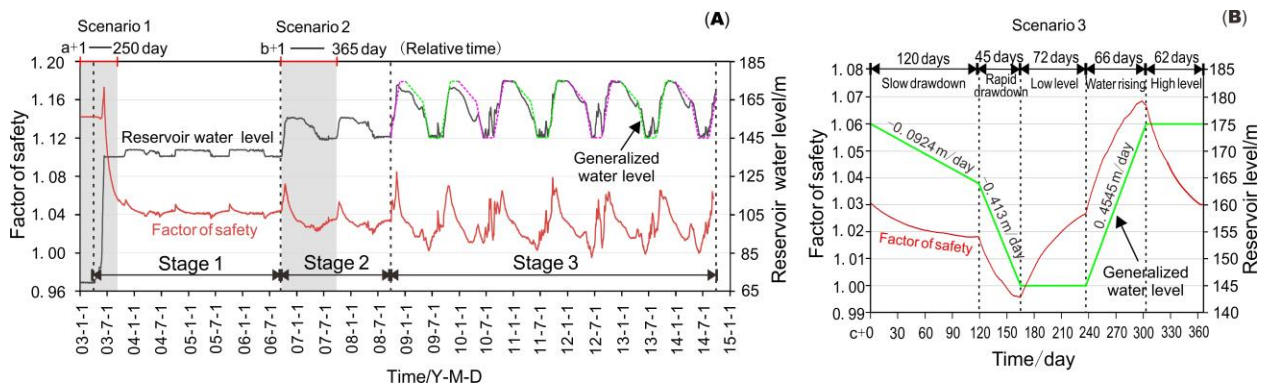

386

387 **Fig. 14** (A) Time series of reservoir level and corresponding calculated *Fos* of Shuping landslide

388 from January 1, 2003 to September 10, 2014. (B) Generalized annual variation curve of the reservoir

389 level obtained by fitting the real water level from 2008 to 2014 (Stage 3) and the corresponding time

390 series of the calculated  $Fos$  of Shuping landslide.

### 391 5.1 Scenario 1: first trial impoundment at 139 m ASL

392 From April 10 to June 11, 2003 (a+100~162 day), the reservoir level rose rapidly from 69 to 135  
393 m ASL. Fig. 15 shows that, during this period, groundwater storage increased in the toe of the slide  
394 mass and within the lower part of the resisting section, increasing buoyancy forces that destabilized  
395 the slope. In contrast, the inwardly-directed flow created a seepage force directed towards the slope,  
396 increasing stability. Owing to the high hydraulic gradient, the stabilizing effect of the seepage force  
397 on the slope prevails over the destabilization due to increased buoyancy, so slope stability was  
398 improved during this phase, as indicated by the increase in  $Fos$  up to 1.17 (Fig. 14).

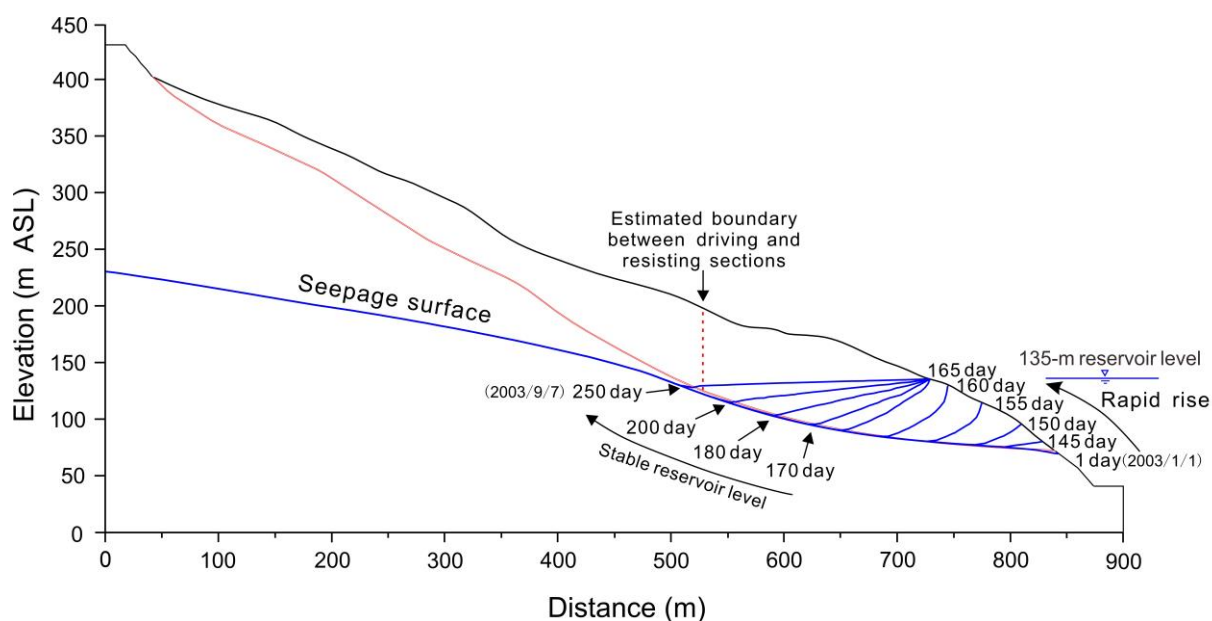

399  
400 **Fig. 15** Simulated groundwater tables during the period of rapid reservoir rise from January 1, 2003  
401 to September 7, 2003.

402 In the following period (a+163 day~), the reservoir level was maintained around 135 m ASL.  
403 The water table progressively rose until it approximated the reservoir level. During this period, the

404 slope of the water table front decreased gradually, leading to a decrease of the seepage force in the  
405 slope. At the same time, the buoyancy uplift effect increased steadily in the **resisting** section as the  
406 groundwater table rose (Fig. 15). The combination of a decreased seepage force and the increased  
407 buoyancy led to a decrease in slope stability during this phase, so the  $Fos$  dropped below its initial  
408 value of 1.142. Afterwards, the slope stability continued to decrease until the new but temporary state  
409 of equilibrium was reached. The safety factor was around 1.045 as the reservoir level was maintained  
410 around 135 m ASL.

411 The delay between the reservoir impoundment and the decrease in stability is consistent with the  
412 creation of obvious cracks after the reservoir rose to 135 m ASL (Wang et al., 2007). The famous  
413 Qianjiangping landslide (Fig. 2), which is located near the Shuping landslide and has similar  
414 geological setting, occurred one month (13 July 2003) after the reservoir first rose to 135 m ASL  
415 (Xiao et al., 2007).

## 416 **5.2 Scenario 2: first trial impoundment at 156 m ASL**

417 During the periods when the water level rose from 135 m ASL to 156 m ASL (b+1~30 day) (Fig.  
418 16), and stayed stable at 156 m ASL (b+30~138 day), the effects of ground water level change on the  
419 stability of Shuping landslide were similar to the effects in scenario 1. When the reservoir level  
420 dropped from 156 to 145 m ASL during the drawdown period of February to June (b+138~260 day),  
421 groundwater flow towards the reservoir, thus creating an outward, destabilizing seepage force on the  
422 slope. The computed factor of safety decreased gradually from 1.070 to 1.025, in agreement with the  
423 observed increase in deformation velocity during this period. As the reservoir level was then

424 maintained at 145 m ASL (b+260~365 day), the transient seepage gradually transitioned to  
 425 steady-state seepage, accompanied by a progressively decline of the water table in the inside part of  
 426 the fluctuation zone, a weakening of the destabilizing effect of the seepage force, and a result of  
 427 increase in slope stability ( $Fos=1.035$ ).

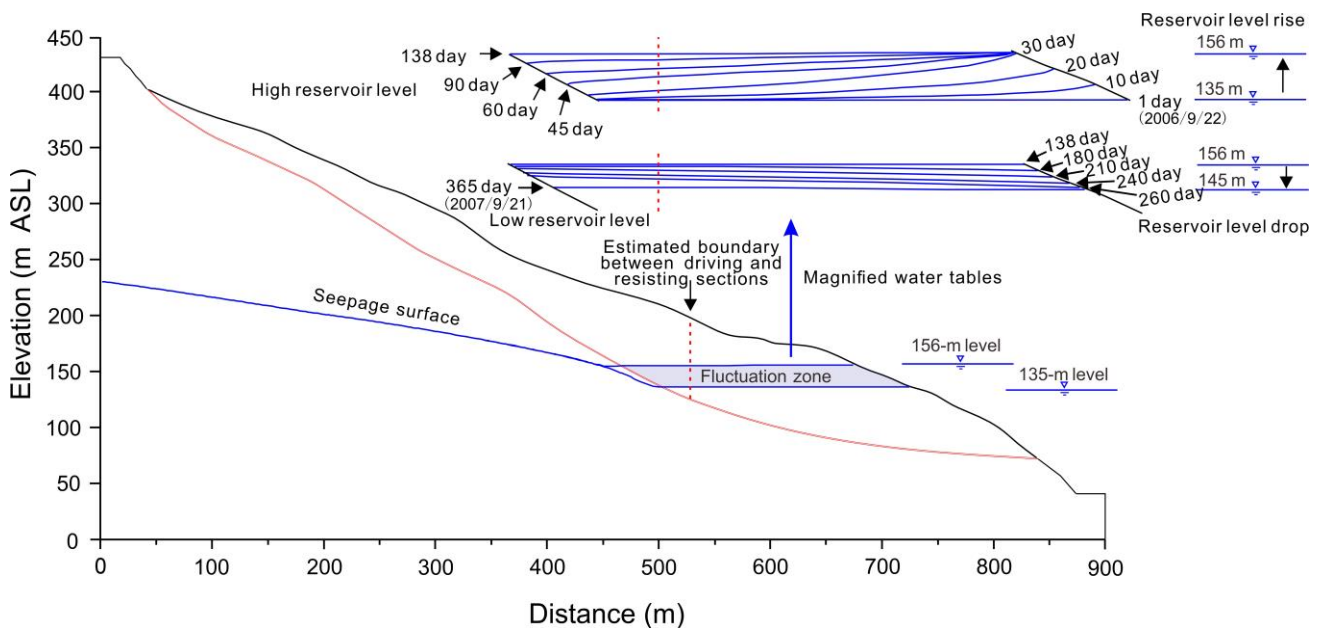

428  
 429 **Fig. 16** Simulated groundwater tables as the variation of reservoir water level from 22 September  
 430 2006 to 21 September 2007.

431 **5.3 Scenario 3: trial impoundment at 175 m ASL**

432 During 2008 to 2014 the reservoir level periodically fluctuated between 145 and 175 m ASL  
 433 (Stage 3), in accordance with a generalized annual water level variation curve that consists of five  
 434 phases (Fig. 13(B)).

435 During the slow drawdown period, the groundwater storage in the driving section is reduced by  
 436 an amount that approximately matches the reduction in the **resisting** section (Fig. 17(A)), so the  
 437 effect of buoyancy forces on slope stability is small. Moreover, because drawdown is slow,



438 groundwater gradients are also low, limiting the magnitude of destabilizing seepage forces. Thus, the  
439 safety factor of the slope decreases from 1.031 to 1.018 with only a modest amount (Fig. 14(B)).

440 During the rapid drawdown phase, groundwater gradients are steeper and produce large,  
441 destabilizing seepage forces on the slope. The sharp decline of slope stability (Fig. 17(B)) is  
442 consistent with the observed high deformation velocity during this phase. The slope stability  
443 becomes least ( $Fos=0.995$ ) as the reservoir declines to its lowest level of 145 m ASL, when a  
444 maximum difference of 14 m is computed for groundwater levels in the slide mass (Fig. 17(B)).  
445 Although the decreased buoyancy of the **resisting** section makes an offsetting contribution to slope  
446 stability, its magnitude is small compared to that of destabilizing seepage forces.

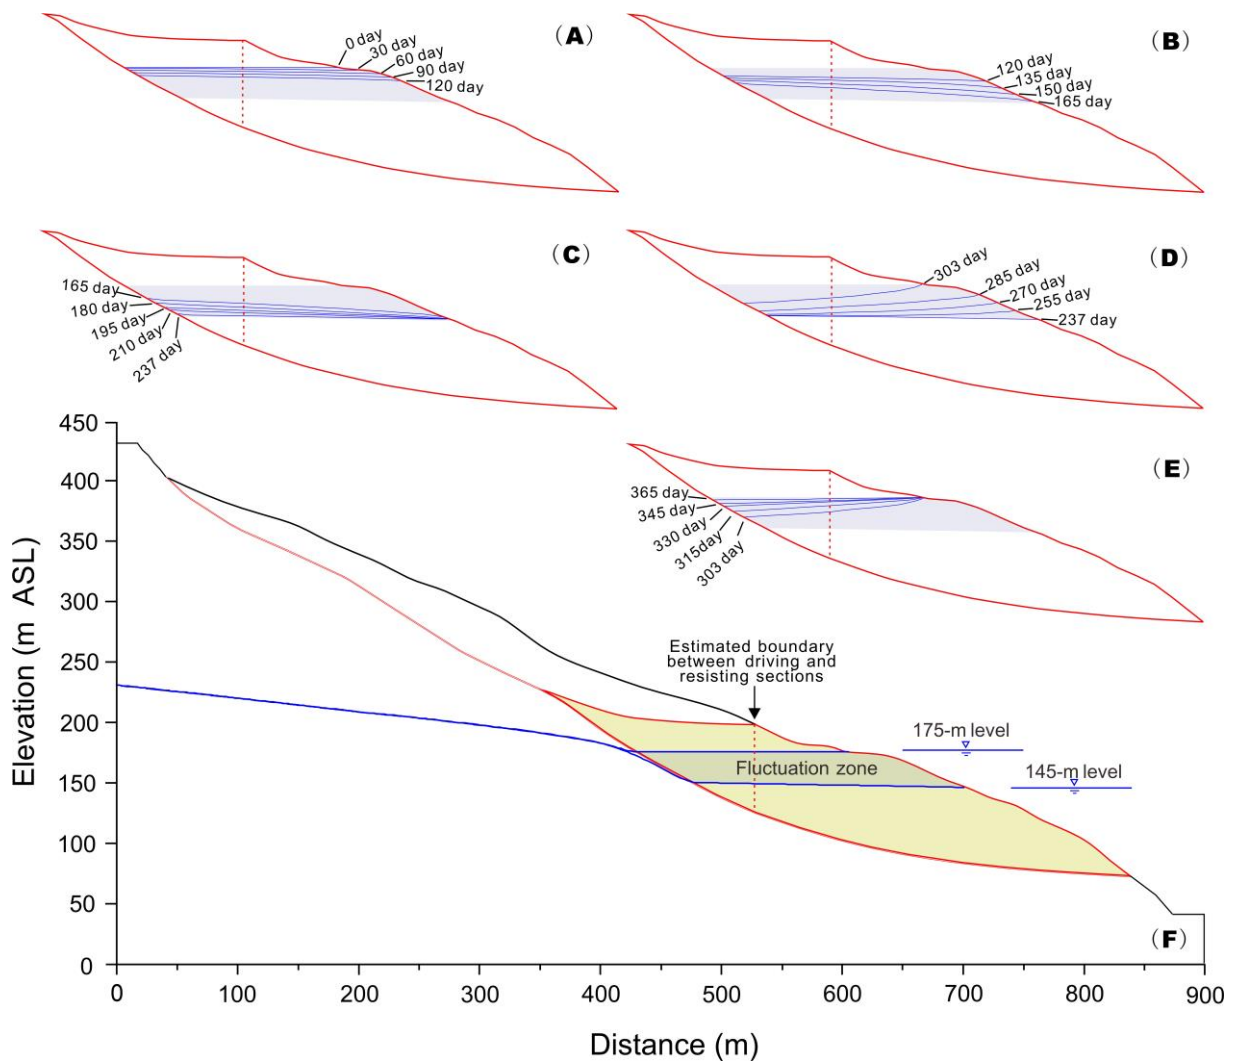

447

448 **Fig. 17** Simulated groundwater tables over the period of generalized annual variation of reservoir  
 449 water level in Stage 3. Gray shaded zone depicts the 145 to 175 m elevation interval. (A) slow  
 450 drawdown phase; (B) rapid drawdown phase; (C) low level phase; (D) water level rising phase; (E)  
 451 high water level phase

452 In the following three phases, representing the low water, rising and high water phases, the  
 453 characteristics of the slope vary in a manner similar to those modeled in scenario 2. The stability of  
 454 the landslide (see Fig. 14(B)) recovers gradually from 0.995 to 1.027 in the low water level phase,  
 455 due to the dissipation of destabilizing seepage forces (Fig. 17(C)). Slope stability then increases  
 456 rapidly as the reservoir level rises rapidly, when the seepage force reverses to become directed into

457 the slope (Fig. 17(D)). The slope obtains the highest stability with  $Fos$  value of 1.067 when the water  
458 level rises to the highest level 175 m ASL. Slope stability then decreases gradually as that seepage  
459 force declines (Fig. 17(E)). All these results agree with the observed variations in deformation  
460 velocity of the Shuping landslide (Sec. 4.2).

461 In summary, during periods of reservoir drawdown and rise, the seepage force plays a dominant  
462 role in the stability of Shuping landslide, but being negative in drawdown period and positive in the  
463 rising period. In contrast, buoyancy effects become increasingly important during periods of steady  
464 reservoir levels, as seepage forces steadily decrease.

## 465 **6 Discussion**

466 This deformation of the Shuping landslide is a function of reservoir levels but probably also  
467 depends on the hydraulic character of its constituent material. The lower part of the slide mass that is  
468 subject to reservoir level fluctuation is mainly composed of dense silty soil with very low hydraulic  
469 conductivity. During periods of rapid change in reservoir level, large differences in groundwater head  
470 can be formed in such material, generating large seepage pressures that can either destabilize or  
471 stabilize the mass, depending on whether the reservoir is rising or falling. On the other hand, low  
472 permeability materials impede rainfall infiltration, rendering the landslide little influenced by rainfall.  
473 Consequently, variations of the reservoir level and their attendant seepage forces dominate the  
474 deformation of Shuping landslide.

475 Based on this observation and on the results of the driving-resisting model, two approaches are  
476 recommended to control the deformation of huge reservoir landslides where the reinforcement  
477 structures are difficult to construct. One method to improve stability is to transfer earth mass from

478 the driving section to the **resisting** section of the slide mass. The other is to use drains or pumps to  
479 lower the water levels inside the slope, in order to reduce differences in groundwater head during  
480 periods of reservoir drawdown. **The first approach has in fact been adopted to enhance the stability of**  
481 **Shuping landslide, which was conducted in September 2014 and completed in June 2015. Fig. 18(A)**  
482 **presents the layout of the engineering treatment and Fig. 18(B) is the subsequent photo of Shuping**  
483 **landslide. Zones I and II are the areas of load reduction, located in the driving section of the**  
484 **slide mass. The earth mass of Zone I ( $\sim 1.8 \times 10^5 \text{ m}^3$ ) and Zone II ( $\sim 4.0 \times 10^5 \text{ m}^3$ ) were transferred**  
485 **to Zones III and IV respectively, which are located in the resisting section that is mostly below**  
486 **reservoir level in the photo (Fig. 18(B)).** Monitoring data show that the deformation velocity was  
487 significantly reduced to low values (about 4.1 mm/month in the main deformation area),  
488 demonstrating the effectiveness of the engineering treatment. These approaches are more economical  
489 and require a shorter construction period than many commonly-used remediation methods such as  
490 the construction of stabilizing piles. Most importantly, these treatments are feasible for many other  
491 large reservoir landslides.

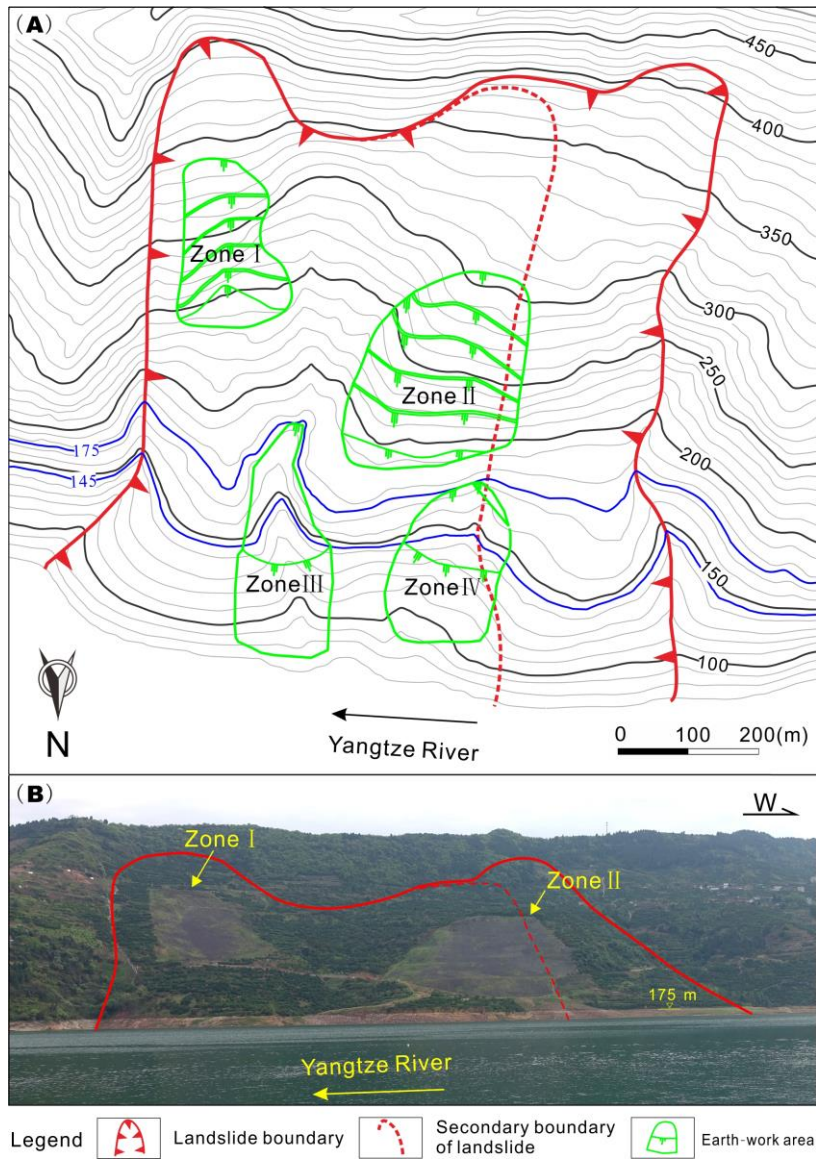

492

493 **Fig. 18** Topography of Shuping landslide before (A) and after (B) engineering treatment, which

494 involved the transfer of earth from Zones I and II to Zones III and IV.

495 **7 Conclusions**

496 A driving-resisting model is presented to elucidate the deformation mechanism of reservoir

497 landslides, as exemplified by Shuping landslide. The deformation velocity of Shuping landslide is

498 closely related to the variations in the level of the Three Gorges reservoir. Rainfall effects are limited

499 in comparison, perhaps due to the low hydraulic conductivity of the slide material. Rapid reservoir  
500 drawdown produces large, destabilizing seepage forces in the slope of the slide mass, as evidenced  
501 by large increases of its deformation velocity. In contrast, rising reservoir levels reverse the direction  
502 of the seepage force, improving slope stability and decreasing the deformation velocity. The  
503 buoyancy effect on the **resisting** section decreased the slope stability when the reservoir first rose to  
504 135 m ASL, but this effect has diminished as the reservoir has attained higher levels that buoy both  
505 the driving and **resisting** sections.

506 Monitoring data, the driving-**resisting** model, and a successful engineering treatment suggest two  
507 means to increase the stability of landslides in the TGR area. Recommended approaches are: 1)  
508 transferring earth mass from the driving section to the **resisting** section; and 2) lowering the ground  
509 water levels inside the slope by drains or by pumping during periods of reservoir drawdown. The  
510 first approach was successfully applied to the Shuping landslide and could be used to treat many  
511 other huge landslides in the Three Gorges Reservoir area.

## 512 **Data availability**

513 The study relied on the observation data from Department of Land and Resources of Hubei  
514 Province, China.

## 515 **Competing interests**

516 The authors declare that they have no conflict of interest.

517     **Acknowledgements**

518             This work was supported by the National Key R&D Program of China (No. 2017YFC1501305);  
519 the Fundamental Research Funds for the Central Universities, China University of Geosciences  
520 (Wuhan) (No. CUGCJ1701); and the National Natural Science Foundation of China (Nos. 41630643,  
521 41827808, 41502290).

522

523 **9 References**

- 524 1. Baum, R.L., Fleming, R.W.: Use of longitudinal strain in identifying driving and resisting  
525 elements of landslides. *Geol. Soc. Am. Bull.* 103, 1121–1132, 1991
- 526 2. Casagli, N., Rinaldi, M., Gargini, A., and Curini, A.: Monitoring of pore water pressure and  
527 stability of streambanks: results from an experimental site on the Sieve River, Italy, *Earth Surface  
528 Processes and Landforms*, 24, 1095-1114, [https://doi.org/10.1002/\(SICI\)1096-9837\(199911\)24:  
529 12<1095::AID-ESP37>3.0.CO;2-F](https://doi.org/10.1002/(SICI)1096-9837(199911)24:12<1095::AID-ESP37>3.0.CO;2-F), 1999.
- 530 3. Chang, S.B., Zhang, S.M. and Xiang B.: Engineering geology manual. China Architecture &  
531 Building Press, Beijing, 2007 (in Chinese).
- 532 4. Cojean, R., and Cai, Y.J.: Analysis and modeling of slope stability in the Three-Gorges Dam  
533 reservoir (China) -The case of Huangtupo landslide, *Journal of Mountain Science*, 8, 166-175,  
534 <https://doi.org/10.1007/s11629-011-2100-0>, 2011.
- 535 5. Du, J., Yin, K., and Lacasse, S.: Displacement prediction in colluvial landslides, three Gorges  
536 reservoir, China, *Landslides*, 10, 203-218, <https://doi.org/10.1007/s10346-012-0326-8>, 2013.
- 537 6. Dumperth, C., Rohn, J., Fler, A., and Xiang, W.: Local-scale assessment of the displacement  
538 pattern of a densely populated landslide, utilizing finite element software and terrestrial radar  
539 interferometry: a case study on Huangtupo landslide (PR China), *Environmental Earth Sciences*,  
540 75, 880, <http://doi.10.1007/s12665-016-5475-y>, 2016.
- 541 7. Froude, M. J., and Petley, D. N.: Global fatal landslide occurrence from 2004 to 2016, *Natural  
542 Hazards and Earth System Sciences*, 18, 2161-2181, <https://doi.org/10.5194/nhess-18-2161-2018>,  
543 2018.



- 544 8. Guerriero, L., Coe, J.A., Revellino, P., Grelle, G., Pinto, F., and Guadagno, F.M.:  
545 Influence of slip-surface geometry on earth-flow deformation, Montaguto earth flow, southern  
546 Italy: *Geomorphology*, 219, 285-305, <http://dx.doi.org/10.1016/j.geomorph.2014.04.039>, 2014.
- 547 9. Handwerger, A.L., Roering, J., Schmidt, D.A., and Rempel, A.W.: Kinematics of earthflows in the  
548 Northern California Coast Ranges using satellite interferometry, *Geomorphology*, 246, 321-333,  
549 <https://doi.org/10.1016/j.geomorph.2015.06.003>, 2015.
- 550 10. Hu, X. W., Tang, H. M., and Liu, Y. R.: Physical model studies on stability of Zhaoshuling  
551 landslide in area of Three Gorges Reservoir, *Chinese Journal of Rock Mechanics and Engineering*,  
552 24, 2089-2095, 2005 (in Chinese).
- 553 11. Huang, B. L., Yin, Y. P., Wang, S. C., Tan, J., M., and Liu, G. N.: Analysis of the Tangjiaxi  
554 landslide-generated waves in the Zhexi Reservoir, China, by a granular flow coupling model,  
555 *Natural Hazards and Earth System Sciences*, 17, 657-670,  
556 <https://doi.10.5194/nhess-17-657-2017>, 2017.
- 557 12. Huang, D., and Gu, D. M.: Influence of filling-drawdown cycles of the Three Gorges reservoir  
558 on deformation and failure behaviors of anacinal rock slopes in the Wu Gorge, *Geomorphology*,  
559 295, 489-506, <https://doi.org/10.1016/j.geomorph.2017.07.028>, 2017.
- 560 13. Huang, F. M., Huang, J. S., Jiang, S. H., and Zhou, C. B.: Landslide displacement prediction based  
561 on multivariate chaotic model and extreme learning machine, *Engineering Geology*, 218, 173-186,  
562 <https://doi.org/10.1016/j.enggeo.2017.01.016>, 2017.
- 563 14. Hubei Province Geological Environment Terminus: Survey report of Shuping landslide in Three  
564 Gorges Reservoir area, Zigui, Hubei Province, China, 2013 (in Chinese).

- 565 15. Hutchinson, J.N.: An influence line approach to the stabilization of slopes by cuts and fills,  
566 *Canadian Geotechnical Journal*, 21, 363-370, <https://doi.org/10.1139/t84-036>, 1984.
- 567 16. Iverson, R.M.: Unsteady, nonuniform landslide motion: 2. Linearized theory and the kinematics of  
568 transient response, *Journal of Geology*, 94, 349-364, <https://doi.org/10.1086/629034>, 1986.
- 569 17. Jia, G. W., Zhan, T. L., Chen, Y. M., and Fredlund, D. G.: Performance of a large-scale slope  
570 model subjected to rising and lowering water levels, *Engineering Geology*, 106, 92-103,  
571 <https://doi.org/10.1016/j.enggeo.2009.03.003>, 2009.
- 572 18. Junfeng Z., Xiangyue M., and Erqian Z.: Testing study on landslide of layered slope induced by  
573 fluctuation of water level, *Chinese Journal of Rock Mechanics and Engineering*, 23, 2676-2680,  
574 2004 (in Chinese).
- 575 19. Lambe, T. W., and Whitman, R. V.: *Soil mechanics SI version*, John Wiley & Sons, 2008.
- 576 20. Lane, P. A., and Griffiths, D. V.: Assessment of stability of slopes under drawdown conditions,  
577 *Journal of geotechnical and geoenvironmental engineering*, 126, 443-450,  
578 [https://doi.org/10.1061/\(ASCE\)1090-0241\(2000\)126:5\(443\)](https://doi.org/10.1061/(ASCE)1090-0241(2000)126:5(443)), 2000.
- 579 21. Li, D., Yin, K., and Leo, C.: Analysis of Baishuihe landslide influenced by the effects of reservoir  
580 water and rainfall, *Environmental Earth Sciences*, 60, 677-687,  
581 <https://doi.org/10.1007/s12665-009-0206-2>, 2010.
- 582 22. Liao, H. J., Sheng, Q., Gao, S. H., and Xu, Z. P.: Influence of drawdown of reservoir water level  
583 on landslide stability, *Chinese Journal of Rock Mechanics and Engineering*, 24, 3454-3458, 2005  
584 (in Chinese).
- 585 23. Lu, S. Q., Yi, Q. L., Yi, W., Huang, H. F., and Zhang, G. D.: Analysis of deformation and failure

- 586 mechanism of Shuping landslide in Three Gorges reservoir area. *Rock and Soil Mechanics* 35(4),  
587 1123-1130, 2014 (in Chinese).
- 588 24. Lu, T.: Study of Formation Mechanism and Later Trend Prediction of Fanjiaping Landslide and  
589 Baishuihe Landslide, Dissertation, China Three Gorges University (in Chinese).
- 590 25. Ma, J. W., Tang, H. M., Hu, X. L., Bobet A., Zhang, M., Zhu, T. W., Song, Y. J., and Eldin M. A.  
591 E.: Identification of causal factors for the Majiagou landslide using modern data mining methods,  
592 *Landslides*, 14, 311-322, <https://doi.org/10.1007/s10346-016-0693-7>, 2017.,
- 593 26. McKean, J. and Roering, J.: Objective landslide detection and surface morphology mapping using  
594 high-resolution airborne laser altimetry, *Geomorphology*, 57, 331-351,  
595 [https://doi.org/10.1016/S0169-555X\(03\)00164-8](https://doi.org/10.1016/S0169-555X(03)00164-8), 2004.
- 596 27. Miao, F. S., Wu, Y. P., Li, L. W., Tang, H. M., and Li, Y. N.: Centrifuge model test on the  
597 retrogressive landslide subjected to reservoir water level fluctuation, *Engineering geology*, 245:  
598 169-179, <https://doi.org/10.1016/j.enggeo.2018.08.016>, 2018.
- 599 28. Paronuzzi, P., and Bolla, A.: The prehistoric Vajont rockslide: an updated geological model,  
600 *Geomorphology*, 169, 165-191, <https://doi.org/10.1016/j.geomorph.2012.04.021>, 2012.
- 601 29. Prokešová, R., Kardoš, M., Tábor, P., Medvedová, A., Stacke, V., Chudy, F.: Kinematic  
602 behaviour of a large earthflow defined by surface displacement monitoring, dem differencing, and  
603 ERT imaging, *Geomorphology* 224, 86-101, <https://doi.org/10.1016/j.geomorph.2014.06.029>,  
604 2014.
- 605 30. Qin, H. B.: The Mechanism of Landslide Influenced by Rainfall and Reservoir Water Level  
606 Fluctuation and Renewed Criterion Research in Three-Gorges Reservoir, Dissertation, China

- 607 Three Gorges University, 2011(in Chinese).
- 608 31. Ren, F., Wu, X. L., and Zhang, K. X., and Niu, R. Q.: Application of wavelet analysis and a  
609 particle swarm-optimized support vector machine to predict the displacement of the Shuping  
610 landslide in the Three Gorges, China, *Environmental earth sciences*, 73, 4791-4804,  
611 <https://doi.org/10.1007/s12665-014-3764-x>, 2015.
- 612 32. Rinaldi, M., and Casagli, N.: Stability of streambanks formed in partially saturated soils and  
613 effects of negative pore water pressures: the Sieve River (Italy), *Geomorphology*, 26, 253-277,  
614 <https://doi.org/10.1007/s12665-014-3764-x>, 1999.
- 615 33. Rinaldi, M., Casagli, N., Dapporto, S., and Gargini, A.: Monitoring and modelling of pore water  
616 pressure changes and riverbank stability during flow events, *Earth Surface Processes and  
617 Landforms*, 29, 237-254, <https://doi.org/10.1002/esp.1042>, 2004.
- 618 34. Song, W. P.: The unsaturated seepage and stability analysis on slopes at river banks with the case  
619 of Xicheng landslides in Yunyang. Dissertation, Chengdu University of Technology, 2011(in  
620 Chinese).
- 621 35. Song, K., Wang, F. W., Yi, Q. L., and Lu, S. Q.: Landslide deformation behavior influenced by  
622 water level fluctuations of the Three Gorges Reservoir (China), *Engineering Geology*, 247, 58-68,  
623 <https://doi.org/10.1016/j.enggeo.2018.10.020>, 2018.
- 624 36. Song, K., Yan, E. C., Zhang, G. D., Lu, S. Q., and Y, Q. L.: Effect of hydraulic properties of soil  
625 and fluctuation velocity of reservoir water on landslide stability, *Environmental earth sciences*, 74,  
626 5319-5329, <https://doi.org/10.1007/s12665-015-4541-1>, 2015.
- 627 37. Sultan, H.A., and Seed, H.B.: Stability of sloping core earth dams, *Journal of the Soil Mechanics*

- 628        **and Foundations Division, 93, 45-68, 1967.**
- 629    38. Tang, H. M., Li, C. D., Hu, X. L., Su, A. J., Wang, L. Q., Wu, Y. P., Criss, R. E., Xiong, C. R.,  
630        and Li, Y. A.: Evolution characteristics of the Huangtupo landslide based on in situ tunneling and  
631        monitoring, *Landslides*, 12, 511-521, <https://doi.org/10.1007/s10346-014-0500-2>, 2015.
- 632    39. Tang, H. M., Wasowski, J., and Juang, C. H.: Geohazards in the three Gorges Reservoir Area,  
633        China - Lessons learned from decades of research, *Engineering Geology*, 261,  
634        <https://doi.org/10.1016/j.enggeo.2019.105267>, 2019.
- 635    40. **Terzaghi, K., Peck, R. B., Mesri, G.: Soil mechanics in engineering practice, John Wiley & Sons,**  
636        **1996.**
- 637    41. Wang, F.: Deformation prediction of Jiuxianping landslide in Yunyang Country based on  
638        numerical simulation, Dissertation, Chengdu University of Technology, 2013 (in Chinese).
- 639    42. Wang, F., Zhang, Y., Wang, G., Peng, X., Huo, Z., Jin, W., and Zhu, C.: Deformation features of  
640        Shuping landslide caused by water level changes in Three Gorges Reservoir area, China, *Chinese*  
641        *Journal of Rock Mechanics and Engineering*, 26, 509-517, (in Chinese).
- 642    43. Wang, J. E., Xiang, W., and Lu, N.: Landsliding triggered by reservoir operation: a general  
643        conceptual model with a case study at Three Gorges Reservoir, *Acta Geotechnica*, 9, 771-788,  
644        <https://doi.org/10.1007/s11440-014-0315-2>, 2014.
- 645    44. Wang, H. L., and Xu, W. Y.: Stability of Liangshuijing landslide under variation water levels of  
646        Three Gorges Reservoir, *European Journal of Environmental and Civil Engineering*, 17(sup1):  
647        s158-s177, <https://doi.org/10.1080/19648189.2013.834592>, 2013.
- 648    45. Wen, T., Tang, H. M., Wang, Y. K., Lin, C. Y., and Xiong, C. R.: Landslide displacement

- 649 prediction using the GA-LSSVM model and time series analysis: a case study of Three Gorges  
650 Reservoir, China, *Natural Hazards and Earth System Sciences*, 17, 2181-2198,  
651 <https://doi.org/10.1002/esp.1042>, 2017.
- 652 46. Wu, Q., Tang, H. M., Ma, X. H., Wu, Y. P., Hu, X. L., Wang, L. Q., Criss, R. E., Yuan, Y., and Xu,  
653 Y. J.: Identification of movement characteristics and causal factors of the Shuping landslide based  
654 on monitored displacements, *Bulletin of Engineering Geology and the Environment*, 78,  
655 2093-2106, <https://doi.org/10.1007/s10064-018-1237-2>, 2019.
- 656 47. Xiao, S. R., Liu, D. F., and Hu, Z. Y.: Study on geomechanical model of Qianjiangping landslide,  
657 Three Gorges Reservoir, *Rock and Soil Mechanics*, 28, 1459-1464, 2007 (in Chinese).
- 658 48. Yin, Y., Huang, B., Wang, W., Wei, Y., Ma, X., Ma, F., and Zhao, C.: Reservoir-induced landslides  
659 and risk control in Three Gorges Project on Yangtze River, China, *Journal of Rock Mechanics and*  
660 *Geotechnical Engineering*, 8, 577-595, <https://doi.org/10.1016/j.jrmge.2016.08.001>, 2016.
